# Supplementary material for: Measurement report: Cloud Processes and the Transport of Biological Emissions Regulate Southern Ocean Particle and Cloud Condensation Nuclei Concentrations
Source: Copernicus journal article supplement (doi:10.5194/acp-2020-731), 2020-09-11
Supplement: Supplementary file [file acp-2020-731-RC3-supplement.pdf]

# Measurement report: Cloud Processes and the Transport of Biological Emissions Regulate Southern Ocean Particle and Cloud Condensation Nuclei Concentrations

Kevin J. Sanchez<sup>1\*</sup>, Gregory C. Roberts<sup>1,2</sup>, Georges Saliba<sup>1</sup>, Lynn M. Russell<sup>1</sup>, Cynthia Twohy<sup>3</sup>, Michael J. Reeves<sup>4</sup>, Ruhi S. Humphries<sup>5</sup>, Melita D. Keywood<sup>5</sup>, Jason P. Ward<sup>5</sup>, Ian M. McRobert<sup>6</sup>

<sup>1</sup>Scripps Institution of Oceanography, University of California, San Diego, CA, USA

<sup>2</sup>Centre National de Recherches Météorologiques, Météo-France & CNRS UMR3589, Toulouse, France

<sup>3</sup>NorthWest Research Associates, Redmond, WA, USA

<sup>4</sup>National Center for Atmospheric Research, Boulder, CO, USA

<sup>5</sup>Climate Science Centre, CSIRO Oceans and Atmosphere, Aspendale, Australia

<sup>6</sup>Engineering and Technology Program, CSIRO Oceans and Atmosphere, Hobart, Australia

\*Now at: Universities Space Research Association, Columbia, MD, USA

Now at: NASA Langley Research Center, Hampton, VA, USA

*Correspondence to:* Kevin J. Sanchez (kjs356@gmail.com)

**Abstract.** Long-range transport of biogenic emissions from the coast of Antarctica, precipitation scavenging, and cloud processing are the main processes that influence the observed variability in Southern Ocean (SO) marine boundary layer (MBL) condensation nuclei (CN) and cloud condensation nuclei (CCN) concentrations during the austral summer. Airborne particle measurements on the HIAPER GV from north-south transects between Hobart, Tasmania and 62°S during the Southern Ocean Clouds, Radiation Aerosol Transport Experimental Study (SOCRATES) were separated into four regimes comprising combinations of high and low concentrations of CCN and CN. In 5-day HYSPLIT back trajectories, air parcels with elevated CCN concentrations were almost always shown to have crossed the Antarctic coast, **a location with elevated phytoplankton emissions relative to the rest of the SO**. The presence of high CCN concentrations was also consistent with high cloud fractions over their trajectory, suggesting there was substantial growth of biogenically formed particles through cloud processing. Cases with low cloud fraction, due to the presence of cumulus clouds, had high CN concentrations, consistent with previously reported new particle formation in cumulus outflow regions. Measurements associated with elevated precipitation during the previous 1.5-days of their trajectory had low CCN concentrations indicating CCN were effectively scavenged by precipitation. A course-mode fitting algorithm was used to determine the primary marine aerosol (PMA) contribution which accounted for < 20% of CCN (at 0.3% supersaturation) and cloud droplet number concentrations. Vertical profiles of CN and large particle concentrations ( $D_p > 0.07\mu\text{m}$ ) indicated that particle formation occurs more frequently above the MBL; however, the growth of recently formed particles typically occurs in the MBL, consistent with cloud processing and the condensation of volatile compound oxidation products.

CCN measurements on the *R/V Investigator* as part of the second Clouds, Aerosols, Precipitation, Radiation and atmospheric Composition Over the southern Ocean (CAPRICORN-2) campaign were also conducted during the same period as the SOCRATES study. The *R/V Investigator* observed elevated CCN concentrations near Australia, likely due to continental and coastal biogenic emissions. The Antarctic coastal source of CCN from the south as well as CCN sources from the mid-latitudes create a latitudinal gradient in CCN concentration with an observed minimum in the SO between 55°S and 60°S. The SOCRATES airborne measurements are not influenced by Australian continental emissions, but still show evidence of elevated CCN concentrations to the south of 60°S, consistent with biogenic coastal emissions. In addition, a latitudinal gradient in the particle composition is observed; more hygroscopic particles to the north, consistent with a greater fraction of sea salt from PMA, and more sulfate and organic particles to the south, which are likely from biogenic sources in coastal Antarctica.

## 1 Introduction

The marine boundary layer (MBL) over the Southern Ocean (SO) displays some of the most pristine conditions in the world with few anthropogenic influences, making cloud properties and radiative forcing particularly sensitive to relatively small changes in aerosol source emissions (Downey et al., 1990; Fossum et al., 2018; Hudson et al., 1998; Li et al., 2018; McCoy et al., 2015; Murphy et al., 1998b; Pandis et al., 1994; Pierce and Adams, 2006; Pringle et al., 2009; Whittlestone and Zahorowski, 1998; Wood et al., 2015; Yoon and Brimblecombe, 2002). In spite of a growing number of studies, climate models still struggle to represent SO cloud radiative properties, partly because their representation of available cloud condensation nuclei (CCN) is not well constrained (Bodas-Salcedo et al., 2014; Brient et al., 2019; Carslaw et al., 2013; Hyder et al., 2018; Lee et al., 2015; Mace and Protat, 2018; McCoy et al., 2014; Ogunro et al., 2018; Schmale, 2019; Trenberth and Fasullo, 2010). A major shortcoming in the ability of Global Climate Models (GCM) to predict future climate change (i.e., insufficient cloud forcing (Bodas-Salcedo et al., 2014)) is associated with biases in satellite measurements and a lack of in-situ measurements needed to validate satellite and models in the SO (Lenschow et al., 1999; Seinfeld et al., 2016). Understanding the impact of these particle sources on the cloud system and their variability is required for accurate prediction of SO cloud properties and to understand the impact of aerosol-cloud interactions on the Earth's energy budget. These issues motivated the Southern Ocean Clouds, Radiation Aerosol Transport Experimental Study (SOCRATES), which involved in-situ measurements of clouds and aerosol over the SO on-board the NSF/NCAR HIAPER Gulfstream V (GV) (UCAR/NCAR - Earth Observing Laboratory, 2005). The analysis covered in this study identifies patterns associated with variation in the observed condensation nuclei (CN) and CCN concentrations over the SO.

Aerosol concentrations in the SO are typically derived from natural marine sources and rarely influenced by continental or anthropogenic sources. These marine sources consist of primary marine aerosol (PMA) particles produced from sea spray and bubble bursting, and secondary organic and sulfate particles formed from biologically emitted volatile organic compounds (VOCs) such as dimethyl sulfide (DMS) (Bates et al., 1998b, 2012; Covert et al., 1992; Frossard et al., 2014; Middlebrook et al., 1998; Murphy et al., 1998a; Pirjola et al., 2000; Quinn et al., 2000, 2017; Rinaldi et al., 2010; Saliba et al., 2019). Primary

particles from the Antarctic continent are not a major source of particles to the SO because it is mostly covered in ice (Chambers et al., 2017); so the main sources of primary aerosol from Antarctica to the SO are limited to local anthropogenic pollution from research stations, blowing snow, frost flowers and sea bird emissions (Frieß et al., 2004; Huang and Jaeglé, 2017; Liu et al., 2018; Schmale et al., 2013).

70 New particle formation (NPF) from the oxidation of marine biologically emitted VOCs occurs when the particle condensational sink is low and temperature is low, both of which are prevalent conditions over the SO (Raes et al., 1997; Yue and Deepak, 1982). While new particle formation has been observed in the SO marine boundary layer (Covert et al., 1992; Humphries et al., 2015; Kyrö et al., 2013; Pirjola et al., 2000; Weller et al., 2015) it occurs more commonly in the free troposphere (Bates et al., 1998b; Clarke et al., 1998; Humphries et al., 2016; Odowd et al., 1997; Reus et al., 2000; Sanchez et al., 2018; Yoon and  
75 Brimblecombe, 2002) owing to the absence of PMA in the SO MBL, which reduces total particle surface area (McCoy et al., 2015). In addition, new particle formation is commonly associated with cumulus outflow regions due to the DMS-rich air lofted by the convection and the high relative humidity, creating an environment that may be able to allow binary nucleation between sulphuric acid (a DMS oxidation product) and water (Bates et al., 1998b; Clarke et al., 1999; Cotton et al., 1995; Perry and Hobbs, 1994; Twohy et al., 2002), but ternary nucleation with ammonia or amines is also possible (Weber et al.,  
80 1998).

Furthermore, the remote mid-latitude SO contains much less biological activity near the ocean surface relative to the Antarctic continental coast, which creates a latitudinal gradient in aerosol concentrations driven by biogenic particle formation (Alroe et al., 2019; Humphries et al., 2016; Kim et al., 2019; O'shea et al., 2017; Odowd et al., 1997; Weller et al., 2018). This trend in biology is linked to observations showing a distinct transition in aerosol properties around 64°S where CN concentrations  
85 south of 64°S are about five times higher during the austral spring months (Alroe et al., 2019; Humphries et al., 2016). Regions of sea ice melt on the Antarctic coast have been observed to be a significant source of methanesulfonic acid (MSA) as well as DMS and organic nitrogen (Dallósto et al., 2017; Dowd et al., 1997; Vana et al., 2007), known precursors of new particle formation (Almeida et al., 2013; Dawson et al., 2012). For this reason, long-range transport of CN and gaseous precursors in the MBL and free troposphere from the Antarctic continental coast plays a significant role in enhancing CN and CCN  
90 concentrations in the SO (Bates et al., 1998a; Clarke et al., 1998, 2013; Dzepina et al., 2015; Korhonen et al., 2008; Woodhouse et al., 2010).

The enhanced CN concentrations from biogenic sources are transported from coastal Antarctica to the remote SO, suggesting that biological particles may account for a significant fraction of SO particles. Other field studies have shown large variability in the contribution of PMA particles to total CN concentrations, ranging between 8-100% while the remaining 0-92% is from  
95 biogenic organic and sulfate particles (Fossum et al., 2018; Gras and Keywood, 2017; McCoy et al., 2015; Quinn et al., 2017; Yoon and Brimblecombe, 2002). Much of the observed variability is linked to seasonal variations in SO biological activity (Ayers and Gras, 1991; Korhonen et al., 2008). On the Antarctic peninsula, NPF events occurred mostly during the austral summer, with CCN concentrations (at 0.4% supersaturation) increasing on average by 11% (Kim et al., 2019). Similarly, higher average concentrations of cloud droplet number concentrations (CDNC) are observed in the austral summer (Mace and

100 Avey, 2017; McCoy et al., 2015). Conversely, PMA CCN is found to have little seasonal variability relative to biogenic CCN (Vallina et al., 2006), likely driven by small seasonal differences in wind speed (Saliba et al., 2019). However, though some studies suggest biologically productive waters enhance PMA production, which would also increase CCN concentrations in coastal biologically productive regions (Collins et al., 2016; Fuentes et al., 2010). In a recent study, a parcel model showed that PMA may limit CCN concentration indirectly, by enhancing in-cloud water uptake at low supersaturations, causing a decrease of maximum in-cloud supersaturations and cloud droplet number concentrations by suppressing the activation of smaller particles (Fossum et al., 2020). Consequently, an increased fraction of small particles remain as interstitial aerosol and do not undergo growth via cloud processing. Likewise, previous observations of wind speed and the production of PMA negatively correlate with accumulation mode particle concentrations (Gras and Keywood, 2017). Furthermore, organic enrichment of PMA in biologically productive waters can further reduce their hygroscopicity (Burrows et al., 2018; Cravigan et al., 2019; Law et al., 2017; Meskhidze and Nenes, 2010).

With substantial growth of newly formed particles by the uptake of VOC oxidation products through cloud processing, biogenic sourced particles may grow CCN larger and increase CDNC (Hoppel et al., 1986; Hudson et al., 2015; Pirjola et al., 2004; Russell et al., 2007; Sanchez et al., 2018). Cloud processing occurs when small particles activate to form cloud droplets, leading to enhanced condensation of VOC oxidation products onto the droplet because the droplet surface area is larger than that of the unactivated particles. Aqueous phase oxidation of absorbed VOCs also results in the formation of less volatile compounds, which remain in the particle phase upon evaporation of the water (Hoppel et al., 1986). In the event that the cloud droplets do not precipitate, the evaporated particles are larger than their original size since non-volatile compounds (i.e., sulfate and MSA) that condensed onto the cloud droplet remain in the particle phase. This added mass shifts Aitken mode particles to the accumulation mode (Hoppel et al., 1986; Hudson et al., 2015; Kaufman and Tanré, 1994; Sanchez et al., 2017). Results from McCoy et al. (2015) emphasized this sensitivity and showed global model simulations of natural aerosol account for more than half the spatial and temporal variability in the satellite derived CDNC over the SO. These areas of enhanced CDNC also correlate with areas of high chlorophyll-a, a tracer for phytoplankton activity, increasing secondary sulfate and organic aerosol concentrations (Krüger and Graßl, 2011; McCoy et al., 2015). In contrast, the inclusion of PMA in a GCM increased CCN concentrations at 0.2% supersaturation ( $CCN_{0.2}$ ) by 150-500% (Pierce and Adams, 2006), suggesting PMA is the largest contributor to CCN concentrations. SO satellite-derived cloud properties (liquid water content (LWC), effective radius, cloud fraction) showed seasonal variations that resulted in a difference in cloud radiative forcing (i.e., surface cooling) between 14 and 23 W m<sup>-2</sup> (McCoy et al., 2014). Increased CDNC is also shown to correlate with enhanced cloud fraction, significantly increasing overall cloud shortwave forcing (Rosenfeld et al., 2019). If cloud droplets do not evaporate and instead precipitate, CN and CCN concentrations are reduced through precipitation scavenging (Croft et al., 2010; Stevens and Feingold, 2009).

130 In this study, we discuss airborne CN and CCN measurements from the SOCRATES campaign. Measurements are divided into four categories based on the total CN and  $CCN_{0.3}$  (CCN concentration at 0.3% supersaturation) to identify differences in processes and sources that lead to the observed variability of measurements. A back trajectory analysis is performed to identify the source of air parcels and their history with respect to their proximity to clouds and precipitation. Additionally, a PMA

mode fitting algorithm (Saliba et al., 2019) is utilized to understand the contribution of PMA to CCN and observed CDNC concentrations. The findings describe the observed spatial gradients and relative importance of biogenic sulfate and PMA to CDNCs, which ultimately contribute to improving estimates of the energy budget in the SO.

## 2 Methods

### 2.1 NSF/NCAR HIAPER GV measurements and *R/V Investigator* CCN measurements

Airborne measurements were collected on the NSF/NCAR Gulfstream-V High-performance Instrumented Airborne Platform for Environmental Research (GV HIAPER) ~~observational platform~~. The GV was stationed at the Hobart International Airport, Tasmania, during the austral summer between 15 January and 24 February 2018. The flight strategy during SOCRATES involved ferrying out to a predetermined area of interest followed by a series of straight vertical profiles, and level legs to sample below, in and above clouds. The GV HIAPER conducted 15 research flights (RF) over the SO between 42.5 °S and 62.1 °S and between 133.8 °E and 163.1 °E at altitudes ranging from 50-7500 m. Flight tracks and flight strategy are presented in McFarquhar et al. (submitted) Figure 1 and 4 respectively.

A wing-mounted Ultra-High Sensitivity Aerosol Spectrometer (UHSAS, Droplet Measurement Technologies, Boulder, CO) measured particle size distribution between 0.06 and 1.0  $\mu\text{m}$  in diameter; however, the 0.06-0.07  $\mu\text{m}$  diameter range was not used in this analysis due to instrument noise. Ambient subsaturated particles collected with the UHSAS were dried through ram heating and deiced components. A condensation particle counter (CPC, TSI 3760A) was used to measure total particle concentrations (CN, diameter > 0.01  $\mu\text{m}$ ). CCN measurements were performed with two miniature continuous-flow stream-wise thermal gradient chambers, one in scanning supersaturation mode and one in constant supersaturation mode (Roberts and Nenes, 2005). The supersaturation range of the scanning CCN counter spanned from 0.06 % to 0.87 % and recorded a continuous CCN spectrum every five minutes. The constant supersaturation CCN counter operated at 0.43 % supersaturation (referred to as  $\text{CCN}_{0.43}$ ), at 1 Hz and was used to identify CCN gradients in vertical profiles (Section 3.6). CCN concentration at 0.3% supersaturation ( $\text{CCN}_{0.3}$ , derived from the scanning CCN counter) was used throughout this study as a reference CCN concentration because  $\text{CCN}_{0.3}$  best corresponded to observed CDNCs (Section 3.3). The internal chamber pressure of both CCN counters was controlled to 400 hPa. A cloud droplet probe (CDP, DMT, Boulder, CO) was used to measure cloud droplet concentration (2-50  $\mu\text{m}$  wet diameter). The scanning CCN spectra and UHSAS number size distributions were used to estimate the 0.07  $\mu\text{m}$  diameter hygroscopicity parameter ( $\kappa_{70}$ ) for each MBL leg. All particle measurements were converted to surface standard temperature and pressure. CN and CCN measurements made in-cloud (defined by CDP measurements of  $\text{LWC} > 0.1 \text{ g kg}^{-1}$ ) were excluded from the analysis due to the influence of droplet shattering within the aerosol inlets. During the research flights, areas of intense precipitation were avoided, but some measurements were made under drizzle and light rain conditions; however, there was no evidence of droplet shattering in the inlets under these conditions.

In addition to the SOCRATES GV HIAPER measurements, the *R/V Investigator* (CSIRO, Hobart, Tasmania) also collected aerosol and sea water samples during the second Clouds, Aerosols, Precipitation, Radiation and atmospheric Composition

Over the southern Ocean (CAPRICORN-2) campaign. The CAPRICORN-2 study was conducted from 10 January to 21 February 2018, overlapping the SOCRATES study. The *R/V Investigator* covered a north-south transect over the SO, starting at Hobart, Tasmania (43°S) and reaching approximately 66°S, and then returning to Hobart. In this study, CCN measurements collected on the *R/V Investigator* were measured with a commercially-available streamwise CCN counter (CCN-100, Droplet Measurement Technologies, Boulder, CO) that measured CCN concentration between 0.25 and 1.05% supersaturation with a step-wise scan. Each CCN spectrum took approximately one hour to complete. *R/V Investigator* CCN at 0.35% are analyzed and compared to the GV HIAPER CCN<sub>0.3</sub> measurements.

## 2.2 Model data

### 2.2.1 HYSPLIT-GDAS

In this study, HYSPLIT hourly five-day back trajectories were performed with the Global Data Assimilation System (GDAS, <ftp://arlftp.arlhq.noaa.gov/pub/archives/gdas0p5/>) (Rolph et al., 2017; Stein et al., 2015) at 0.5 degree resolution for each CCN spectrum in the MBL leg (below the cloud layer if clouds are present). The average latitude, longitude and altitude (50-500 m) of the MBL legs on the GV HIAPER were used as starting points for the back trajectories. Antarctica is the only continent over which back trajectories passed; none of the airborne aerosol measurements in the MBL were influenced by continental Australia; the only anthropogenic influences were potentially ship tracks and research stations in Antarctica, which we assume to have a negligible impact in this study.

### 2.2.2 ECMWF ReAnalysis (ERA5)

ERA5 is the 5th generation of a climate reanalysis dataset from the European Centre for Medium-Range Weather Forecasts (ECMWF)(Copernicus Climate Change Service (C3S), 2017). The ERA5 model assimilates satellite, ground and airborne measurements to archive the state of the weather and climate. The ERA5 total precipitation and low-level cloud fraction was used for the time period covering the SOCRATES campaign to identify the role of clouds and precipitation in changing CN and CCN concentrations. The ERA5 time resolution is hourly, and spatial resolution is 0.25 degrees.

### 2.3 Primary Marine Aerosol (PMA) Fitting Algorithm

The PMA concentration was determined by fitting the UHSAS distribution of particles greater than 0.2  $\mu\text{m}$  diameter to a single lognormal mode. A single lognormal mode has been found to represent PMA in ambient measurements (Modini et al., 2015; Quinn et al., 2017; Saliba et al., 2019). While this method was previously used on dry particle number size distributions ranging from 0.02 to 5.0  $\mu\text{m}$  (Saliba et al., 2019), the UHSAS measures the particle number size distribution between 0.07 and 1.0  $\mu\text{m}$  diameter. In addition, UHSAS particles in the SOCRATES campaign were not fully dried and a relatively narrow deliquesced mode (GSD =  $1.44 \pm 0.25$ ) is present at approximately 0.6  $\mu\text{m}$  diameter, similar to previous measurements of optically derived particle distributions at high relative humidity (Strapp et al., 1992). This 0.6  $\mu\text{m}$  deliquescent mode was consistently fit by the algorithm. The deliquesced UHSAS particles affect the mode diameter of the fitted PMA size distribution but not the retrieved

PMA (and CCN<sub>0.3</sub>) number concentrations. The concentration of particles in this fitted mode correlated moderately with wind speed (Section 3.5), similar to previous measurements of PMA estimated with this method (Modini et al., 2015; Quinn et al., 2017; Saliba et al., 2019), indicating the fitted mode is a viable approximation of PMA concentrations. The estimated PMA mode sizes are consistent with sea salt (from PMA) observed on size-resolved particles collected in the marine boundary layer during SOCRATES and analysed with transmission electron microscopy (TEM). The TEM analysis shows almost all particles > 0.2  $\mu\text{m}$  in diameter consist of sea salt; and sea salt particles account for 25% to 100% of particle number concentrations at particle diameters > 0.4  $\mu\text{m}$  (Saliba et al. submitted).

### 3 Results

#### 3.1 Particle Regimes

MBL CN and CCN<sub>0.3</sub> measured on the GV HIAPER MBL legs ranged from 116-1153  $\text{cm}^{-3}$  and 17-264  $\text{cm}^{-3}$  and averaged  $540 \pm 246 \text{ cm}^{-3}$  and  $123 \pm 58 \text{ cm}^{-3}$ , respectively. Figure 1b shows the CN and CCN<sub>0.3</sub> concentrations averaged over each CCN spectra scan during GV HIAPER MBL legs throughout the SOCRATES field project (with the exception of RF 14 when the scanning CCN counter malfunctioned). To determine which atmospheric processes drove the variability of nearly an order of magnitude in CN and CCN<sub>0.3</sub>, the measurements were divided into four regimes. The regime thresholds were selected based on the bimodality of observed CN and CCN<sub>0.3</sub> concentrations shown by the histograms and kernel density functions in Figure 1a,c. Figure 1a,c also shows the kernel density estimate based on a normal kernel function. Using this approach, rather than grouping all values into a single bin, each measurement is represented by a normal distribution and integrated to produce the kernel density estimate. The optimal kernel density estimate bandwidth was found to be 28 and 91 for CCN<sub>0.3</sub> and CN, respectively, and calculated using the “ksdensity” function from Matlab (2019), derived from theory developed by Bowman and Azzalini (1997). The Hartigan’s Dip test (Hartigan and Hartigan, 1985) determined that the distribution was not unimodal (P-value < 0.01) for both CN and CCN<sub>0.3</sub>, thereby validating the use of a bimodal distribution for this analysis. The bimodal distribution minima correspond to 125  $\text{cm}^{-3}$  and 750  $\text{cm}^{-3}$  for CCN<sub>0.3</sub> and CN, respectively. Even though only CCN<sub>0.3</sub> was used to determine the particle regimes, Figure 2a illustrates the systematic differences between the averaged CCN spectra and CN concentrations for each of the regimes. The bimodal CCN<sub>0.3</sub> and CN regimes were combined for a total of four regimes. Table 1 shows the average CCN<sub>0.3</sub> and CN concentrations for each of the four regimes, which are distinguished by permutations of high and low CCN<sub>0.3</sub> and CN concentrations.

To differentiate the four regimes in the text, we have given them each abbreviated descriptive names based on their CN and CCN<sub>0.3</sub> concentrations, where the regime with high CN and CCN concentrations is referred to as “Recent particle formation (RPF) + Aged”, the regime with low CN and CCN concentrations is referred to as “Scavenged”, the regime with low CN and high CCN concentrations is referred to as “Aged”, and finally the regime with high CN and low CCN concentrations is referred to as “RPF + Scavenged”. The classification of each regime is based on the relative concentration of Aitken-mode particles (CN) and accumulation-mode particles (CCN), with a naming convention that describes the expected air mass history. Similar

to analyses in previous studies, the relative contribution of the accumulation-mode and the Aitken-mode are used to identify recent particle formation (RPF) events and growth of Aitken-mode particles to accumulation-mode or CCN sizes (Kalivitis et al., 2015; Kleinman et al., 2012; Williamson et al., 2019). The Scavenged regime is named based on evidence indicating the removal of CCN-sized particles through precipitation scavenging (Section 3.3). The Aged regime represents cases in which accumulation-mode is prominent and CCN particle concentrations are relatively high, likely due to atmospheric processes that increase particle size over time such as the condensation of VOC oxidation products or cloud processing (Section 3.2 and 3.3, respectively). The RPF regime exhibits a large Aitken-mode with high concentrations of CN, indicative of recent particle formation (Section 3.2).

### 3.2 Back Trajectories

Previous studies have shown long-range transport of particles and VOCs can affect locally observed particle concentrations and chemical properties (Dzepina et al., 2015; Korhonen et al., 2008). In addition, atmospheric processes affecting particle concentrations upstream of the measurement location reduces the correlation of particle properties to individual (or discrete) processes, such as precipitation, cloud processing, and new particle formation (Albrecht, 1989; Bates et al., 1998b; Russell et al., 2009; Sanchez et al., 2018; Stevens and Feingold, 2009; Stevens and Seifert, 2008; Vallina et al., 2006; Wood et al., 2015). Lagrangian HYSPLIT back trajectories initiated at MBL leg altitudes (50-500 m) were used to determine the path travelled by the parcel of air for the previous five days for each of the MBL legs (Figure 3). Consistent patterns are apparent for each of the particle regimes. Specifically, the back trajectories for the Aged particle regime (Figure 3d) are consistently from the south along the Antarctic coast, which is associated with the elevated ocean surface emissions of DMS and other VOCs produced by phytoplankton activity (Alroe et al., 2019; Humphries et al., 2016; Kim et al., 2019; O'shea et al., 2017; Odowd et al., 1997; Weller et al., 2018). In contrast, the high CN regimes (RPF and RPF + Scavenged) exhibit back trajectories generally from the west from the SO. The scavenged regime consists of back trajectories from both the west and the south, signifying atmospheric process rather than the parcel path and origin influence the observed CN and CCN concentrations.

### 3.3 Cloud Processing

Relating the identified regimes to the observed cloud processes provides insight on how cloud processes affect CN and CCN concentrations. Figure 2c shows  $CCN_{0.3}$  and CDNC correlated moderately ( $r = 0.75$ ), the highest correlation of CCN concentrations relative to other supersaturations, indicating that  $CCN_{0.3}$  is a good proxy for CDNC, and similar to previous estimates of marine cloud effective supersaturations (Martin et al., 1994; Snider et al., 2003). For this comparison, the 90th percentile of CDNC from vertical profiles are matched to the nearest below-cloud MBL leg CCN concentration. As expected, the Aged particle regime accounted for cases with the highest CDNCs ( $192 \pm 100$ ), while the scavenged particle regime accounted for the lowest observed CDNC ( $111 \pm 72$ ). Few CDNC measurements are associated with the RPF (high CN) regimes, suggesting fewer clouds are associated with this regime. Figure 2b shows the cloud effective supersaturation and its

relationship to the CDNC. The cloud effective supersaturation is calculated as the supersaturation where the CCN concentration was equal to the 90th percentile of the measured CDNC. Typically, clouds contain a range of peak supersaturations, controlled by the strength of the updraft and the cloud droplet number concentration (Hudson and Svensson, 1995; Pawlowska and Grabowski, 2006; Siebert and Shaw, 2017). The effective supersaturation accounts for the CCN that have activated adiabatically near cloud base and subsequently dried through sub-adiabatic mixing processes (Sanchez et al., 2017). In general, the observed CDNC weakly correlate to the effective supersaturation (Figure 2b,  $r = 0.47$ ). The two regimes with aged particles (high CCN) consistently had higher CDNCs than the other regimes, highlighting the role of CCN concentrations on impacting CDNC. It is also important to note, CDNC can still be relatively high ( $\sim 200 \text{ cm}^{-3}$ ) in regimes with low CCN under conditions of high in-cloud supersaturations generated by strong updrafts, or with relatively low PMA concentrations which also allows the generation of higher in-cloud supersaturations (Fossum et al., 2020).

To identify the effect of precipitation on CCN concentrations,  $\text{CCN}_{0.3}$  is compared to the total precipitation (obtained from ERA5) integrated over a 35-hour back trajectory, shown in Figure 4a. As expected, the two scavenged regimes (with lower  $\text{CCN}_{0.3}$  concentrations) corresponded to higher total precipitation. Figure 4b shows the Pearson correlation coefficient comparing the base 10 logarithm of the integrated total precipitation over back trajectory times of 0 to 120 hours and CCN concentrations between 0.1% and 0.8% supersaturation. The Pearson's coefficient  $r$ -value peaked for 35-hour back trajectories at CCN supersaturations ranging from 0.3-0.5% (similar to effective in-cloud supersaturations, Figure 4b), indicating air parcel history, particularly in the last 1.5 days, is important for determining atmospheric processes that affect CCN concentration. The Pearson's coefficient for  $\text{CCN}_{0.1}$  was consistently the lowest, likely because  $\text{CCN}_{0.1}$  is associated with PMA, which is quickly replenished in the MBL through sea spray emissions. Similarly, the Pearson's coefficient for  $\text{CCN}_{0.87}$  was also low, likely because this CCN size is associated with RPF particles that are replenished in the FT and subsequently grow to larger sizes (and lower supersaturation CCN).

Figure 4c shows the MBL cloud fraction (obtained from ERA5) over the 120-hour back trajectory averaged for each particle regime. The two regimes with RPF (RPF and RPF + scavenged; high CN) are associated with lower cloud fraction ( $< 0.6$ ), which suggests the presence of cumulus clouds. New particle formation has previously been observed in cumulus cloud outflow regions (Bates et al., 1998b; Clarke et al., 1999; Cotton et al., 1995; Perry and Hobbs, 1994) and is likely the main source of CN in these RPF regimes. In contrast, the "Aged" particle regimes correspond to high MBL cloud fraction ( $> 0.6$ ), which is consistent with stratus and stratocumulus clouds. Stratus and stratocumulus clouds typically include less precipitation, allowing more cloud processing of CN to CCN sizes (Flossmann and Wobrock, 2019; Hoppel et al., 1990; Hudson et al., 2015; Neubauer et al., 2014). In addition, the concentration of ultrafine particles ( $D_p < 30 \text{ nm}$ ) also decreases through Brownian scavenging of interstitial particles onto cloud droplets (Croft et al., 2010), so that higher cloud fractions further reduce CN concentrations. The back trajectories associated with the Aged regime (Figure 3d) typically originate from SO storm tracks to the south, which is consistent with the elevated cloud fraction shown in Figure 4c. The storm track frequency peaks around  $60^\circ\text{S}$  (Patoux et al., 2009), suggesting parcels of air entering the storm track from the south have also been influenced by

coastal Antarctic biogenic DMS and other VOC emissions, eventually leading to increases in CCN concentrations via cloud processing and in the absence of precipitation. The trajectories associated with the RPF and the RPF + Aged regimes are typically from the west, and have fewer clouds. While these regimes have elevated CN concentrations, they are not linked to Antarctic coastal sources within the last 120 hours (Figure 3a,b). Long-range transport of aerosol particles and their precursors for more than five days is possible in the absence of major sinks (i.e., precipitation) (Feichter and Leisner, 2009). The existence of both Aged and RPF in the same regime suggests particles have experienced some cloud processing as well as input from a recent particle formation event. The cloud fraction for the aged + RPF regime is significantly lower than the aged regime (Figure 4c).

### 3.4 Latitudinal Gradient

Both the airborne GV HIAPER and shipborne *R/V Investigator* measurements showed latitudinal (North-South) gradients in CCN concentrations, although differences in the sampling strategies between the two platforms ~~does~~ result in slight differences in the observed latitudinal gradients (discussed in detail below). Both sets of measurements showed high CCN concentrations near Antarctica (Figure 5a-c) consistent with Antarctic coastal biological emissions as a source of aerosol precursors. Back trajectories (Figure 3d; Aged regime) show that long-range transport of these Antarctic coastal emissions generates elevated aerosol concentrations as far north as ~50°S, almost 2000 km away from the Antarctic coast. The Pearson's Coefficient comparing airborne CCN<sub>0.3</sub> measurements with latitude suggest there is not a significant correlation ( $r = -0.09$ ; Figure 5b), unless the particles that were transported 2000 km across the SO from the Antarctic coast are excluded ( $r = -0.26$ ). Similarly, there is no significant trend in airborne CN ( $D_p > 0.01 \mu\text{m}$ ) with latitude ( $r = 0.16$ ) even though previous studies have noted a distinct increase in CN concentrations near the Antarctic shelf at 64°S (Alroe et al., 2019; Humphries et al., 2016). In SOCRATES, however, airborne measurements on the GV HIAPER reached only 62.1°S and did not capture the expected distinct increase in CN concentrations above the Antarctic coastal areas.

The presence of a latitudinal gradient in aerosol concentrations ( $D_p > 0.07 \mu\text{m}$ ) and a weak gradient in the GV HIAPER CCN implies a north-south gradient in particle composition (i.e., hygroscopicity) across the SO. Figure 5d shows the hygroscopicity parameter ( $\kappa$ ) for  $D_p > 0.07 \mu\text{m}$  derived at each MBL leg. The smaller  $\kappa$  (less hygroscopic aerosol) at high latitudes is consistent with the aerosol particles originating from biogenic emissions which have lower hygroscopicity values ( $\kappa = 0.6\text{-}0.9$  for sulfates and  $\kappa < 0.2$  for organics) relative to sea salt ( $\kappa = 1.3$ ) (Kreidenweis and Asa-Awuku, 2014; Petters and Kreidenweis, 2007). As PMA (mostly comprised of sea salt) is present all over the SO, relatively high  $\kappa$  values ( $\kappa \sim 1.0$  (Quinn et al., 2014)) are found north of ~ 55°S where there are fewer biologically-derived organic and sulfate particles. The latitudinal trend of decreasing  $\kappa$  (i.e., more hygroscopic chemical composition toward the lower latitudes) implies particles further south in the SO will need higher in-cloud supersaturations to activate particles of the same size compared to mid regions of the SO where there are fewer biologically derived particles. Alternatively, particle growth and aging enhances the particle's ability to be CCN active even with a low hygroscopicity and initial small size. Despite the lower observed hygroscopicity of particles at

high latitudes based on the airborne measurements, there are a greater number of CCN available (Figure 5b) to increase cloud droplet number and potentially enhance cloud reflectivity at higher latitudes.

Measurements from the *R/V Investigator* during the CAPRICORN-2 study show minima in CCN concentrations around 60°S (Figure 5a), which corresponds to the maximum in SO storm track activity (Patoux et al., 2009); however, this minima in CCN is not observed from the GV measurements and is not as pronounced in similar ship measurements at the same time (Humphries et al., in prep.). As expected, based on the GV measurements, there are elevated CCN concentrations to the south of 60°S related to biogenic emissions from the Antarctic coastal areas. There are also elevated CCN concentrations north of 50°S measured on the *R/V Investigator*, probably related to continental emissions from Australia, phytoplankton emissions near the Australian coast, and even long-range transport of Antarctic coastal emissions (Ayers and Gillett, 2000; Twohy et al., submitted). The different latitudinal trends in CCN observed by the GV HIAPER and *R/V Investigator* are likely a result of the different temporal and spatial sampling strategies between the aircraft and the ship. The GV transects were repeated 15 times over 40 days while avoiding actively precipitating clouds, and represent the CCN variability across the SO. The GV typically started MBL measurements south of 50°S, so the trend in CCN concentrations is not as apparent in the GV measurements compared to the CCN gradient measured on the *R/V Investigator*. The *R/V Investigator* transected the SO twice, with each transect occurring over 20 days.

### 3.5 Primary Marine Aerosol (PMA)

To explore the contribution of marine sources to CCN and CDNC, PMA was estimated from the UHSAS distributions through fitting of the PMA mode using the algorithm from Saliba et al. (2019). The retrieved PMA concentrations varied between  $<1$  and  $25 \text{ cm}^{-3}$  with an average of  $6 \pm 3 \text{ cm}^{-3}$ . The mode diameter of the retrieved PMA number size distribution was  $0.59 \pm 0.04 \text{ }\mu\text{m}$ , which is consistent with the average mode diameter observed in the North Atlantic of  $0.54 \pm 0.21$  (Saliba et al., 2019). The variability for the retrieved mode diameter of the PMA number size distribution likely reflects the available statistics ( $N = 74$ ), and the possibility that the UHSAS particles were not completely dry (section 2.3). The calculated PMA number concentrations moderately correlated to wind speed ( $r = 0.53$ , Figure 6a), as also reported by Saliba et al. (2019) over the North Atlantic and Bates et al. (1998b) south of Australia. Using the ratio of the PMA and  $\text{CCN}_{0.3}$  concentration (Figure 6b), the PMA contribution to SO clouds can be estimated. PMA accounts for up to ~20% of  $\text{CCN}_{0.3}$  (and CDNC), even for conditions with precipitation scavenging in the previous 1.5 days (Figure 4a), and only a small fraction compared to the biogenically generated aerosol. These results are similar to Quinn et al. (2017) who found that PMA contributed to less than 30% of CCN (at 0.3% supersaturation) over the SO, and Twohy et al. (submitted) who found sea-spray aerosol comprised a minority of cloud droplet residual number in 3 SOCRATES cases. Others have reported higher contributions, however of  $> 50\%$  and even up to 100% at high wind speeds ( $>16 \text{ m s}^{-1}$ ) for supersaturations  $\leq 0.3\%$ , during the austral summer (Fossum et al., 2018; Yoon and Brimblecombe, 2002).

### 3.6 Vertical Transport

High concentrations of aerosol particles in the MBL can be formed during new particle formation events in the free troposphere and subsequently entrained downward into the MBL (Bates et al., 1998a; Clarke et al., 1996, 2013; Korhonen et al., 2008; Pirjola et al., 2000; Reus et al., 2000; Russell et al., 1998; Sanchez et al., 2018; Thornton et al., 1997; Yoon and Brimblecombe, 2002). The nucleation of new aerosol particles often occurs in the free troposphere owing to the low total condensational sink and cold temperatures (Raes et al., 1997; Yue and Deepak, 1982). It has traditionally been thought that the SO is a possible exception to this trend because the SO MBL is a pristine environment with few anthropogenic sources, relatively low particle concentrations (condensational sink), and low temperatures compared to other MBLs around the world (Covert et al., 1992; Humphries et al., 2015; Pirjola et al., 2000; Yue and Deepak, 1982). To determine if the SO MBL truly is an exception to the trend, we compare the concentrations of recently formed and aged particles. CN ( $D_p > 0.01 \mu\text{m}$ ) and UHSAS ( $D_p > 0.07 \mu\text{m}$ ) concentrations in the MBL ( $\text{CN}_{\text{MBL}}$ ;  $\text{UHSAS}_{\text{MBL}}$ ) and above the MBL inversion ( $\text{CN}_{\text{Inv}}$ ;  $\text{UHSAS}_{\text{Inv}}$ ) in Figure 7d and 8, respectively. To identify if MBL CN concentrations are higher, similar or lower to CN concentrations above the MBL inversion in Figure 7d, the vertical profiles of CN are divided into three subsections, corresponding to classification where  $\text{CN}_{\text{MBL}} / \text{CN}_{\text{Inv}} > 1.3$  (Figure 7a),  $1.3 > \text{CN}_{\text{MBL}} / \text{CN}_{\text{Inv}} > 0.7$  (Figure 7b), and  $\text{CN}_{\text{MBL}} / \text{CN}_{\text{Inv}} < 0.7$  (Figure 7c). Figures 7a-c show examples of two CN and  $\text{CCN}_{0.43}$  vertical profiles. Figures 7a and 7c show profiles of CN concentrations when  $\text{CN}_{\text{MBL}} / \text{CN}_{\text{Inv}} > 1$  (consistent with particle formation occurring in the MBL) and  $\text{CN}_{\text{MBL}} / \text{CN}_{\text{Inv}} < 1$  (consistent with particle formation in the free troposphere or decoupled layer). When  $\text{CN}_{\text{MBL}} / \text{CN}_{\text{Inv}} \sim 1$ , particle formation has not recently occurred in either the MBL or above the inversion (Figure 7b), and mixing across the inversion homogenizes the aerosol concentrations between the free troposphere and MBL. During this study, the  $\text{CN}_{\text{Inv}}$  is generally greater  $\text{CN}_{\text{MBL}}$ , which suggests particle formation occurs more frequently above the MBL inversion, either in the free troposphere or a decoupled layer above the marine boundary layer. This is also shown in the histogram of the  $\text{CN}_{\text{MBL}} / \text{CN}_{\text{Inv}}$  ratio (Figure 9a), which typically has a value of less than unity. These results are consistent with previous findings that the observed long-range transport of particles and their precursors from phytoplankton blooms (Figure 3d) typically occurs above the MBL (Hudson et al., 1998; Korhonen et al., 2008; Meskhidze and Nenes, 2006; Russell et al., 1998; Sanchez et al., 2018; Thornton et al., 1997; Williamson et al., 2019; Yoon and Brimblecombe, 2002).

Similarly, Figure 8 compares UHSAS concentrations ( $D_p > 0.07 \mu\text{m}$ ) in the MBL to those above the MBL inversion. As the UHSAS provided vertical profiles of the aerosol, we use the UHSAS to complement the static CCN measurements to assess the vertical extent of cloud-active aerosol.  $\text{CCN}_{0.3}$  and  $\text{CCN}_{0.4}$  correlate well with UHSAS ( $D_p > 0.07 \mu\text{m}$ ) concentrations ( $r = 0.94$ ). Contrary to the vertical extent of CN, UHSAS ( $D_p > 0.07 \mu\text{m}$ ) and  $\text{CCN}_{0.43}$  concentrations are generally greater in the MBL compared to above the MBL inversion (Figure 7a-c, Figure 9b), which suggests high MBL UHSAS concentrations resulted from the growth of Aitken mode particles to CCN sizes through cloud processing (Section 3.2.2) (Hudson et al., 1998) or gas-to-particle phase condensation in the MBL (Pirjola et al., 2004; Russell et al., 2007; Sanchez et al., 2018), and consequently associated with the Aged regime (Figure 8). Precipitation also likely played a role in depleting UHSAS and CCN-sized particles ( $D_p > 0.07 \mu\text{m}$ ) for the Scavenged regimes.

## 4 Conclusions

GV HIAPER airborne measurements collected during the Southern Ocean Clouds, Radiation Aerosol Transport Experimental Study (SOCRATES) of CN and CCN over the Southern Ocean (SO) during the austral summer were separated into four regimes based on back trajectories and CN-to-CCN ratios. Airborne CCN measurements were also compared to shipborne measurements on the *R/V Investigator* collected on the second Clouds, Aerosols, Precipitation, Radiation and atmospheric Composition Over the southern Ocean (CAPRICORN-2) campaign. The airborne measurements on the GV HIAPER show a weak gradient in CCN at 0.3% supersaturation ( $CCN_{0.3}$ ) with increasing CCN concentrations to the south between 44°S to 62.1°S, which may be caused by aerosol precursors from Antarctic coastal biological emissions. Shipborne CCN measurements on the *R/V Investigator* also show gradients between 44°S to 67°S with a minimum around 60°S where the peak frequency of SO storm tracks occurs (Patoux et al., 2009). Enhanced ship-based CCN concentrations north of 50°S are likely from Australia, enhanced biogenic activity near the Australian coast, or even long-range transport from Antarctic coastal emissions. Elevated CCN concentrations to the south of 60°S originate from biogenic emissions from the Antarctic coastal area. The differences in the observed trends between airborne and shipborne CCN concentrations is likely due to the different sampling strategies.

The particle regimes from the GV measurements were determined from the observed bimodal distributions in CN and  $CCN_{0.3}$  concentrations, with minimum values at  $750\text{ cm}^{-3}$  and  $125\text{ cm}^{-3}$ , respectively. These minima were used as thresholds to identify different particle regimes.  $CCN_{0.3}$  was used for this analysis because concentrations at 0.3% supersaturation showed the highest correlation with observed cloud droplet number concentrations (CDNCs). Four regimes have been identified based on back trajectories and CN and  $CCN_{0.3}$  concentrations, which ranged from  $116\text{--}1153\text{ cm}^{-3}$  and  $17\text{--}264\text{ cm}^{-3}$ , respectively. These regimes are labelled (1) Scavenged regime, with low CN and  $CCN_{0.3}$  concentrations, (2) Scavenged + recent particle formation (RPF) regime, with high CN and low  $CCN_{0.3}$  concentrations, (3) Aged regime, with low CN and high  $CCN_{0.3}$  concentrations, and (4) Aged +RPF regime, with high CN and  $CCN_{0.3}$  concentrations. Back trajectories associated with the Aged regime consistently intersected the Antarctic coast, an area with elevated phytoplankton biomass relative to the open ocean and a source of biogenic emissions. The Antarctic coastal emissions generate a latitudinal gradient in the UHSAS ( $D_p > 0.07\text{ }\mu\text{m}$ ) and CCN concentrations, as well as a gradient in particle composition (inferred from hygroscopicity). The hygroscopicity gradient was derived from aerosol size distributions (UHSAS) and CCN spectra and resulted in less hygroscopic aerosol (lower  $\kappa$ ) to the south, indicating CCN contained more biogenic sulfate and organics, relative to those further north, which likely contained a larger fraction of more hygroscopic sea salt. Biogenic emissions from coastal Antarctic areas accounted for most of the CCN and CDNC concentrations in the SO during the austral summer, while PMA only accounted for about 20% of observed CCN and CDNC.

Precipitation over the ~1.5-day trajectory inversely correlates with CCN concentrations, indicating precipitation scavenging is a major sink of CCN in the SO. The boundary layer cloud fraction was highest for the aged (high CCN) regime, suggesting cloud processing significantly enhanced CCN concentrations ( $CCN_{0.3} = 185 \pm 38\text{ cm}^{-3}$  for the Aged regime) in non-precipitating clouds. High CN concentrations ( $D_p > 0.01\text{ }\mu\text{m}$ ), characteristic of recent particle formation (RPF) corresponded to cases with low cloud fractions, which is consistent with particle formation in cumulus outflow, also found in previous studies (Bates et

al., 1998b; Clarke et al., 1999; Cotton et al., 1995; Perry and Hobbs, 1994). RPF is the main eventual source of CCN number  
 425 concentration in the SO. In addition, CN concentrations were typically lower in the MBL relative to concentrations above the  
 MBL, suggesting that RPF typically occurred above the MBL inversion – either in the free troposphere or a decoupled layer.  
 In contrast, CCN and particle concentrations with  $D_p > 0.07 \mu\text{m}$  (UHSAS) were higher in the MBL, suggesting growth of  
 recently formed particles to CCN sizes occurred after mixing into the MBL and subsequent aging through gas-to-particle  
 conversion and cloud processing.

430 Due to the remoteness of the SO, biogenic Antarctic coastal emissions appear to be the main CCN source to the SO MBL.  
 Long-range transport of these emissions is shown to enhance measured particle concentrations up to 2000 km away and  
 contribute significantly to the concentration and variability of SO CCN and CDNC. These results indicate that changes in  
 future coastal Antarctica SO phytoplankton production caused by climate change (Deppeler and Davidson, 2017) could have  
 significant ramifications for CCN concentrations and cloud properties in the SO. This work provides measurements that are  
 435 rare for this region of the globe, and may help reduce discrepancies between models and observations of CN and CCN  
 concentrations.

## Acknowledgements

K. J. Sanchez and G. C. Roberts acknowledge the support of NSF Grant No. AGS-1660374. G. Saliba and L. M. Russell  
 440 acknowledge NSF AGS-1660509. SOCRATES data are available through the following EOL UCAR repository  
[https://data.eol.ucar.edu/master\\_lists/generated/socrates/](https://data.eol.ucar.edu/master_lists/generated/socrates/) (Sanchez and Roberts, 2018; UCAR/NCAR-Earth Observing  
 Laboratory, 2019). GDAS data are available at <https://ready.arl.noaa.gov/HYSPLIT.php>. Directions to obtain the ERA5 data  
 are available at [https://confluence.ecmwf.int/display/CKB/How+to+download+ERA5#HowtodownloadERA5-1-](https://confluence.ecmwf.int/display/CKB/How+to+download+ERA5#HowtodownloadERA5-1-Introduction)  
 Introduction. Contains modified Copernicus Climate Change Service Information 2019. The Authors wish to thank the CSIRO  
 445 Marine National Facility (MNF) for its support in the form of sea time on RV Investigator, support personnel, scientific  
 equipment and data management. All data and samples acquired on the voyage are made publicly available in accordance with  
 MNF Policy. Processed *R/V Investigator* CCN data for CAPRICORN-2 are available at  
[https://www.cmar.csiro.au/data/trawler/survey\\_details.cfm?survey=IN2018\\_V01](https://www.cmar.csiro.au/data/trawler/survey_details.cfm?survey=IN2018_V01). Raw data is available by contacting the data  
 librarians (DataLibrariansOAMNF@csiro.au). We thank the UCAR/NCAR-Earth Observing Laboratory and the flight crew  
 450 for all the work done to obtain the measurements used in this manuscript. The Authors have no conflicts of interest to disclose.

## References

Albrecht, B. A.: AEROSOLS, CLOUD MICROPHYSICS, AND FRACTIONAL CLOUDINESS, *Science* (80-. ), 245(4923),  
 1227–1230, doi:10.1126/science.245.4923.1227, 1989.

Almeida, J., Schobesberger, S., Kurten, A., Ortega, I. K., Kupiainen-Maatta, O., Praplan, A. P., Adamov, A., Amorim, A.,

- 455 Bianchi, F., Breitenlechner, M., David, A., Dommen, J., Donahue, N. M., Downard, A., Dunne, E., Duplissy, J., Ehrhart, S., Flagan, R. C., Franchin, A., Guida, R., Hakala, J., Hansel, A., Heinritzi, M., Henschel, H., Jokinen, T., Junninen, H., Kajos, M., Kangasluoma, J., Keskinen, H., Kupc, A., Kurten, T., Kvashin, A. N., Laaksonen, A., Lehtipalo, K., Leiminger, M., Leppa, J., Loukonen, V., Makhmutov, V., Mathot, S., McGrath, M. J., Nieminen, T., Olenius, T., Onnela, A., Petaja, T., Riccobono, F., Riipinen, I., Rissanen, M., Rondo, L., Ruuskanen, T., Santos, F. D., Sarnela, N., Schallhart, S., Schnitzhofer, R., Seinfeld, J. H., Simon, M., Sipila, M., Stozhkov, Y., Stratmann, F., Tome, A., Trostl, J., Tsagkogeorgas, G., Vaattovaara, P., Viisanen, Y., Virtanen, A., Vrtala, A., Wagner, P. E., Weingartner, E., Wex, H., Williamson, C., Wimmer, D., Ye, P. L., Yli-Juuti, T., Carslaw, K. S., Kulmala, M., Curtius, J., Baltensperger, U., Worsnop, D. R., Vehkamäki, H. and Kirkby, J.: Molecular understanding of sulphuric acid-amine particle nucleation in the atmosphere, *Nature*, 502(7471), 359–+, doi:10.1038/nature12663, 2013.
- 460 J. H., Simon, M., Sipila, M., Stozhkov, Y., Stratmann, F., Tome, A., Trostl, J., Tsagkogeorgas, G., Vaattovaara, P., Viisanen, Y., Virtanen, A., Vrtala, A., Wagner, P. E., Weingartner, E., Wex, H., Williamson, C., Wimmer, D., Ye, P. L., Yli-Juuti, T., Carslaw, K. S., Kulmala, M., Curtius, J., Baltensperger, U., Worsnop, D. R., Vehkamäki, H. and Kirkby, J.: Molecular understanding of sulphuric acid-amine particle nucleation in the atmosphere, *Nature*, 502(7471), 359–+, doi:10.1038/nature12663, 2013.
- 465 Alroe, J., Cravigan, L. T., Miljevic, B., Johnson, G. R., Selleck, P., Ruhi, S., Keywood, M. D., Chambers, S. D., Williams, A. G. and Ristovski, Z. D.: Marine productivity and synoptic meteorology drive summer-time variability in Southern Ocean aerosols, , (November), 1–27, 2019.
- Ayers, G. P. and Gillett, R. W.: DMS and its oxidation products in the remote marine atmosphere: implications for climate and atmospheric chemistry, *J. Sea Res.*, 43(3–4), 275–286, doi:10.1016/S1385-1101(00)00022-8, 2000.
- 470 Ayers, G. P. and Gras, J. L.: SEASONAL RELATIONSHIP BETWEEN CLOUD CONDENSATION NUCLEI AND AEROSOL METHANESULFONATE IN MARINE AIR, *Nature*, 353(6347), 834–835, doi:10.1038/353834a0, 1991.
- Bates, T. S., Huebert, B. J., Gras, J. L., Griffiths, F. B. and Durkee, P. A.: International Global Atmospheric Chemistry (IGAC) Project's First Aerosol Characterization Experiment (ACE 1): Overview, *J. Geophys. Res. Atmos.*, 103(D13), 16297–16318, doi:10.1029/97JD03741, 1998a.
- 475 Bates, T. S., Kapustin, V. N., Quinn, P. K., Covert, D. S., Coffman, D. J., Mari, C., Durkee, P. A., De Bruyn, W. J. and Saltzman, E. S.: Processes controlling the distribution of aerosol particles in the lower marine boundary layer during the First Aerosol Characterization Experiment (ACE 1), *J. Geophys. Res.*, 103(D13), 16369–16383, doi:10.1029/97jd03720, 1998b.
- Bates, T. S., Quinn, P. K., Frossard, A. A., Russell, L. M., Hakala, J., Petaja, T., Kulmala, M., Covert, D. S., Cappa, C. D., Li, S. M., Hayden, K. L., Nuaaman, I., McLaren, R., Massoli, P., Canagaratna, M. R., Onasch, T. B., Sueper, D., Worsnop, D. R. and Keene, W. C.: Measurements of ocean derived aerosol off the coast of California, *J. Geophys. Res.*, 117, 13, doi:10.1029/2012jd017588, 2012.
- Bodas-Salcedo, A., Williams, K. D., Ringer, M. A., Beau, I., Cole, J. N. S., Dufresne, J.-L., Koshiro, T., Stevens, B., Wang, Z., Yokohata, T., Bodas-Salcedo, A., Williams, K. D., Ringer, M. A., Beau, I., Cole, J. N. S., Dufresne, J.-L., Koshiro, T., Stevens, B., Wang, Z. and Yokohata, T.: Origins of the Solar Radiation Biases over the Southern Ocean in CFMIP2 Models\*, *J. Clim.*, 27(1), 41–56, doi:10.1175/JCLI-D-13-00169.1, 2014.
- 485 J. Clim., 27(1), 41–56, doi:10.1175/JCLI-D-13-00169.1, 2014.

- Bowman, A. W. and Azzalini, A.: Applied Smoothing Techniques for Data Analysis, Oxford University Press Inc., New York., 1997.
- Brient, F., Roehrig, R. and Voldoire, A.: Evaluating Marine Stratocumulus Clouds in the CNRM-CM6-1 Model Using Short-Term Hindcasts, *J. Adv. Model. Earth Syst.*, 11(1), 127–148, doi:10.1029/2018MS001461, 2019.
- 490 Burrows, S. M., Easter, R., Liu, X., Ma, P.-L., Wang, H., Elliott, S. M., Singh, B., Zhang, K. and Rasch, P. J.: OCEANFILMS sea-spray organic aerosol emissions &ndash; Part 1: implementation and impacts on clouds, *Atmos. Chem. Phys. Discuss.*, (May), 1–27, doi:10.5194/acp-2018-70, 2018.
- Carslaw, K. S., Lee, L. A., Reddington, C. L., Pringle, K. J., Rap, A., Forster, P. M., Mann, G. W., Spracklen, D. V., Woodhouse, M. T., Regayre, L. A. and Pierce, J. R.: Large contribution of natural aerosols to uncertainty in indirect forcing,  
 495 *Nature*, 503(7474), 67–+, doi:10.1038/nature12674, 2013.
- Chambers, S. D., Choi, T., Park, S. J., Williams, A. G., Hong, S. B., Tositti, L., Griffiths, A. D., Crawford, J. and Pereira, E.: Investigating Local and Remote Terrestrial Influence on Air Masses at Contrasting Antarctic Sites Using Radon-222 and Back Trajectories, *J. Geophys. Res. Atmos.*, 122(24), 13,525–13,544, doi:10.1002/2017JD026833, 2017.
- Clarke, A. D., Li, Z. and Litchy, M.: Aerosol dynamics in the equatorial Pacific Marine boundary layer: Microphysics, diurnal  
 500 cycles and entrainment, *Geophys. Res. Lett.*, 23(7), 733–736, doi:10.1029/96gl00778, 1996.
- Clarke, A. D., Davis, D., Kapustin, V. N., Eisele, F., Chen, G., Paluch, I., Lenschow, D., Bandy, A. R., Thornton, D., Moore, K., Mauldin, L., Tanner, D., Litchy, M., Carroll, M. A., Collins, J. and Albercook, C.: Particle nucleation in the tropical boundary layer and its coupling to marine sulfur sources, *Science* (80-. ), 282(5386), 89–92, doi:10.1126/science.282.5386.89, 1998.
- 505 Clarke, A. D., Kapustin, V. N., Eisele, F. L., Weber, R. J. and McMurry, P. H.: Particle production near marine clouds: Sulfuric acid and predictions from classical binary nucleation, *Geophys. Res. Lett.*, 26(16), 2425–2428, doi:10.1029/1999gl000438, 1999.
- Clarke, A. D., Freitag, S., Simpson, R. M. C., Hudson, J. G., Howell, S. G., Brekhovskikh, V. L., Campos, T., Kapustin, V. N. and Zhou, J.: Free troposphere as a major source of CCN for the equatorial pacific boundary layer: long-range transport and  
 510 teleconnections, *Atmos. Chem. Phys.*, 13(15), 7511–7529, doi:10.5194/acp-13-7511-2013, 2013.
- Collins, D. B., Bertram, T. H., Sultana, C. M., Lee, C., Axson, J. L. and Prather, K. A.: Phytoplankton blooms weakly influence the cloud forming ability of sea spray aerosol, *Geophys. Res. Lett.*, 43(18), 9975–9983, doi:10.1002/2016GL069922, 2016.
- Copernicus Climate Change Service (C3S): ERA5: Fifth generation of ECMWF atmospheric reanalyses of the global climate, , 1/7/2019 [online] Available from: <https://cds.climate.copernicus.eu/cdsapp#!/home>, 2017.
- 515 Cotton, W. R., Alexander, G. D., Hertenstein, R., Walko, R. L., McAnelly, R. L. and Nicholls, M.: Cloud venting - A review

- and some new global annual estimates, *Earth-Science Rev.*, 39(3–4), 169–206, doi:10.1016/0012-8252(95)00007-0, 1995.
- Covert, D. S., Kapustin, V. N., Quinn, P. K. and Bates, T. S.: NEW PARTICLE FORMATION IN THE MARINE BOUNDARY-LAYER, *J. Geophys. Res.*, 97(D18), 20581–20589, doi:10.1029/92jd02074, 1992.
- Cravigan, L. T., Mallet, M. D., Vaattovaara, P., Harvey, M. J., Law, C. S., Modini, R. L., Russell, L. M., Stelcer, E., Cohen,  
520 D. D., Olsen, G., Safi, K., Burrell, T. J. and Ristovski, Z.: Sea spray aerosol organic enrichment, water uptake and surface tension effects, *Atmos. Chem. Phys. Discuss.*, (September), 1–35, doi:10.5194/acp-2019-797, 2019.
- Croft, B., Lohmann, U., Martin, R. V., Stier, P., Wurzler, S., Feichter, J., Hoose, C., HeikkiläCurrency Sign, U., Van Donkelaar, A. and Ferrachat, S.: Influences of in-cloud aerosol scavenging parameterizations on aerosol concentrations and wet deposition in ECHAM5-HAM, *Atmos. Chem. Phys.*, 10(4), 1511–1543, doi:10.5194/acp-10-1511-2010, 2010.
- 525 Dall’osto, M., Beddows, D. C. S., Tunved, P., Krejci, R., Ström, J., Hansson, H. C., Yoon, Y. J., Park, K. T., Becagli, S., Udisti, R., Onasch, T., Ódowd, C. D., Simó, R. and Harrison, R. M.: Arctic sea ice melt leads to atmospheric new particle formation, *Sci. Rep.*, 7(1), doi:10.1038/s41598-017-03328-1, 2017.
- Dawson, M. L., Varner, M. E., Perraud, V., Ezell, M. J., Gerber, R. B. and Finlayson-Pitts, B. J.: Simplified mechanism for new particle formation from methanesulfonic acid, amines, and water via experiments and ab initio calculations, *Proc. Natl. Acad. Sci. U. S. A.*, 109(46), 18719–18724, doi:10.1073/pnas.1211878109, 2012.  
530
- Deppeler, S. L. and Davidson, A. T.: Southern Ocean phytoplankton in a changing climate, *Front. Mar. Sci.*, 4(FEB), doi:10.3389/fmars.2017.00040, 2017.
- Dowd, C. D. O., Lowe, J. A., Smith, M. H., Davison, B., Hewitt, C. N. and Harrison, R. M.: Biogenic sulphur emissions and inferred non-sea-salt-sulphate particularly during Events of new particle formation were Instrumentation and Cruise Summary,  
535 *Atlantic*, 102(DII), 1997.
- Downey, A., Jasper, J. D., Gras, J. J. and Whittlestone, S.: Lower tropospheric transport over the Southern Ocean, *J. Atmos. Chem.*, 11(1), 43–68, doi:10.1007/BF00053667, 1990.
- Dzepina, K., Mazzoleni, C., Fialho, P., China, S., Zhang, B., Owen, R. C., Helmig, D., Hueber, J., Kumar, S., Perlinger, J. A., Kramer, L. J., Dziobak, M. P., Ampadu, M. T., Olsen, S., Wuebbles, D. J. and Mazzoleni, L. R.: Molecular characterization  
540 of free tropospheric aerosol collected at the Pico Mountain Observatory: a case study with a long-range transported biomass burning plume, *Atmos. Chem. Phys.*, 15(9), 5047–5068, doi:10.5194/acp-15-5047-2015, 2015.
- Feichter, J. and Leisner, T.: Climate engineering: A critical review of approaches to modify the global energy balance, *Eur. Phys. J. Spec. Top.*, 176(1), 81–92, doi:10.1140/epjst/e2009-01149-8, 2009.
- Flossmann, A. I. and Wobrock, W.: Cloud processing of aerosol particles in marine stratocumulus clouds, *Atmosphere (Basel)*,  
545 10(9), doi:10.3390/atmos10090520, 2019.

- Fossum, K. N., Ovadnevaite, J., Ceburnis, D., Dall'Osto, M., Marullo, S., Bellacicco, M., Simó, R., Liu, D., Flynn, M., Zuend, A. and O'Dowd, C.: Summertime Primary and Secondary Contributions to Southern Ocean Cloud Condensation Nuclei, *Sci. Rep.*, 8(1), 13844, doi:10.1038/s41598-018-32047-4, 2018.
- 550 Fossum, K. N., Ovadnevaite, J., Ceburnis, D., Preißler, J., Snider, J. R., Huang, R.-J., Zuend, A. and O'Dowd, C.: Sea-spray regulates sulfate cloud droplet activation over oceans, *npj Clim. Atmos. Sci.*, 3(1), 14, doi:10.1038/s41612-020-0116-2, 2020.
- Frieß, U., Hollwedel, J., König-Langlo, G., Wagner, T. and Platt, U.: Dynamics and chemistry of tropospheric bromine explosion events in the Antarctic coastal region, *J. Geophys. Res. D Atmos.*, 109(6), 1–15, doi:10.1029/2003jd004133, 2004.
- 555 Frossard, A. A., Russell, L. M., Burrows, S. M., Elliott, S. M., Bates, T. S. and Quinn, P. K.: Sources and composition of submicron organic mass in marine aerosol particles, *J. Geophys. Res.*, 119(22), 12977–13003, doi:10.1002/2014jd021913, 2014.
- Fuentes, E., Coe, H., Green, D., De Leeuw, G. and McFiggans, G.: On the impacts of phytoplankton-derived organic matter on the properties of the primary marine aerosol - Part 1: Source fluxes, *Atmos. Chem. Phys.*, 10(19), 9295–9317, doi:10.5194/acp-10-9295-2010, 2010.
- 560 Gras, J. L. and Keywood, M.: Cloud condensation nuclei over the Southern Ocean: wind dependence and seasonal cycles, *Atmos. Chem. Phys.*, 17, 4419–4432, doi:10.5194/acp-17-4419-2017, 2017.
- Hartigan, J. A. and Hartigan, P. M.: The Dip Test of Unimodality, *Ann. Stat.*, 13(1), 70–84, doi:10.1214/aos/1176346577, 1985.
- Hoppel, W. A., Frick, G. M. and Larson, R. E.: Effect of nonprecipitating clouds on the aerosol size distribution in the marine boundary layer, *Geophys. Res. Lett.*, 13(2), 125–128, doi:10.1029/GL013i002p00125, 1986.
- 565 Hoppel, W. A., Fitzgerald, J. W., Frick, G. M., Larson, R. E. and Mack, E. J.: Aerosol size distributions and optical properties found in the marine boundary layer over the Atlantic Ocean, *J. Geophys. Res.*, 95(D4), 3659, doi:10.1029/jd095id04p03659, 1990.
- Huang, J. and Jaeglé, L.: Wintertime enhancements of sea salt aerosol in polar regions consistent with a sea ice source from blowing snow, *Atmos. Chem. Phys.*, 17(5), 3699–3712, doi:10.5194/acp-17-3699-2017, 2017.
- 570 Hudson, J. G. and Svensson, G.: Cloud Microphysical Relationships in California Marine Stratus, *J. Appl. Meteorol.*, 34(12), 2655–2666 [online] Available from: <http://www.jstor.org/stable/26187383>, 1995.
- Hudson, J. G., Xie, Y. and Yum, S. S.: Vertical distributions of cloud condensation nuclei spectra over the summertime Southern Ocean., 1998.
- 575 Hudson, J. G., Noble, S. and Tabor, S.: Journal of Geophysical Research : Atmospheres Cloud supersaturations from CCN spectra Hoppel minima, , 1–17, doi:10.1002/2014JD022669.Received, 2015.

- Humphries, R. S., Schofield, R., Keywood, M. D., Ward, J., Pierce, J. R., Gionfriddo, C. M., Tate, M. T., Krabbenhoft, D. P., Galbally, I. E., Molloy, S. B., Klekociuk, A. R., Johnston, P. V., Kreher, K., Thomas, A. J., Robinson, A. D., Harris, N. R. P., Johnson, R. and Wilson, S. R.: Boundary layer new particle formation over East Antarctic sea ice - Possible Hg-driven nucleation?, *Atmos. Chem. Phys.*, 15(23), 13339–13364, doi:10.5194/acp-15-13339-2015, 2015.
- 580 Humphries, R. S., Klekociuk, A. R., Schofield, R., Keywood, M., Ward, J. and Wilson, S. R.: Unexpectedly high ultrafine aerosol concentrations above East Antarctic sea ice, *Atmos. Chem. Phys.*, 16(4), 2185–2206, doi:10.5194/acp-16-2185-2016, 2016.
- Humphries, R. S., Gribben, S., McRobert, I., Ward, J., Keywood, M. D., Flynn, C., Kulkarni, G. R., Harnwell, J., Mace, G., Alexander, S. P., Selleck, P., Protat, A. and Taylor, S.: Southern Ocean latitudinal gradients of Cloud Condensation Nuclei,
- 585 n.d.
- Hyder, P., Edwards, J. M., Allan, R. P., Hewitt, H. T., Bracegirdle, T. J., Gregory, J. M., Wood, R. A., Meijers, A. J. S., Mulcahy, J., Field, P., Furtado, K., Bodas-Salcedo, A., Williams, K. D., Copsey, D., Josey, S. A., Liu, C., Roberts, C. D., Sanchez, C., Ridley, J., Thorpe, L., Hardiman, S. C., Mayer, M., Berry, D. I. and Belcher, S. E.: Critical Southern Ocean climate model biases traced to atmospheric model cloud errors, *Nat. Commun.*, 9(1), doi:10.1038/s41467-018-05634-2, 2018.
- 590 Kalivitis, N., Kerminen, V. M., Kouvarakis, G., Stavroulas, I., Bougiatioti, A., Nenes, A., Manninen, H. E., Petäjä, T., Kulmala, M. and Mihalopoulos, N.: Atmospheric new particle formation as a source of CCN in the eastern Mediterranean marine boundary layer, *Atmos. Chem. Phys.*, 15(16), 9203–9215, doi:10.5194/acp-15-9203-2015, 2015.
- Kaufman, Y. J. and Tanré, D.: Effect of variations in super-saturation on the formation of cloud condensation nuclei, *Nature*, 369(6475), 45–48, doi:10.1038/369045a0, 1994.
- 595 Kim, J., Jun Yoon, Y., Gim, Y., Hee Choi, J., Jin Kang, H., Park, K. T., Park, J. and Yong Lee, B.: New particle formation events observed at King Sejong Station, Antarctic Peninsula - Part 1: Physical characteristics and contribution to cloud condensation nuclei, *Atmos. Chem. Phys.*, 19(11), 7583–7594, doi:10.5194/acp-19-7583-2019, 2019.
- Kleinman, L. I., Daum, P. H., Lee, Y. N., Lewis, E. R., Sedlacek, A. J., Senum, G. I., Springston, S. R., Wang, J., Hubbe, J., Jayne, J., Min, Q., Yum, S. S. and Allen, G.: Aerosol concentration and size distribution measured below, in, and above cloud
- 600 from the DOE G-1 during VOCALS-REx, *Atmos. Chem. Phys.*, 12(1), 207–223, doi:10.5194/acp-12-207-2012, 2012.
- Korhonen, H., Carslaw, K. S., Spracklen, D. V., Mann, G. W. and Woodhouse, M. T.: Influence of oceanic dimethyl sulfide emissions on cloud condensation nuclei concentrations and seasonality over the remote Southern Hemisphere oceans: A global model study, *J. Geophys. Res.*, 113(D15), D15204, doi:10.1029/2007jd009718, 2008.
- Kreidenweis, S. M. and Asa-Awuku, A.: Aerosol Hygroscopicity: Particle Water Content and Its Role in Atmospheric
- 605 Processes, in *Treatise on Geochemistry*, pp. 331–361, Elsevier., 2014.

- Krüger, O. and Graßl, H.: Southern Ocean phytoplankton increases cloud albedo and reduces precipitation, *Geophys. Res. Lett.*, 38(8), n/a-n/a, doi:10.1029/2011GL047116, 2011.
- Kyrö, E. M., Kerminen, V. M., Virkkula, A., Dal Maso, M., Parshintsev, J., Ruiz-Jimenez, J., Forsström, L., Manninen, H. E., Riekkola, M. L., Heinonen, P. and Kulmala, M.: Antarctic new particle formation from continental biogenic precursors, *Atmos. Chem. Phys.*, 13(7), 3527–3546, doi:10.5194/acp-13-3527-2013, 2013.
- Law, C. S., Smith, M. J., Harvey, M. J., Bell, T. G., Cravigan, L. T., Elliott, F. C., Lawson, S. J., Lizotte, M., Marriner, A., McGregor, J., Ristovski, Z., Safi, K. A., Saltzman, E. S., Vaattovaara, P. and Walker, C. F.: Overview and preliminary results of the Surface Ocean Aerosol Production (SOAP) campaign, *Atmos. Chem. Phys.*, 17(22), 13645–13667, doi:10.5194/acp-17-13645-2017, 2017.
- Lee, Y. H., Adams, P. J. and Shindell, D. T.: Evaluation of the global aerosol microphysical ModelE2-TOMAS model against satellite and ground-based observations, *Geosci. Model Dev.*, 8(3), 631–667, doi:10.5194/gmd-8-631-2015, 2015.
- Lenschow, D. H., Krummel, P. B. and Siems, S. T.: Measuring entrainment, divergence, and vorticity on the mesoscale from aircraft, *J. Atmos. Ocean. Technol.*, 16(10), 1384–1400, doi:10.1175/1520-0426(1999)016<1384:medavo>2.0.co;2, 1999.
- Li, J., Michalski, G., Davy, P., Harvey, M., Katzman, T. and Wilkins, B.: Investigating Source Contributions of Size-Aggregated Aerosols Collected in Southern Ocean and Baring Head, New Zealand Using Sulfur Isotopes, *Geophys. Res. Lett.*, 45(8), 3717–3727, doi:10.1002/2018GL077353, 2018.
- Liu, J., Dedrick, J., Russell, L. M., Senum, G. I., Uin, J., Kuang, C., Springston, S. R., Richard Leitch, W., Aiken, A. C. and Lubin, D.: High summertime aerosol organic functional group concentrations from marine and seabird sources at Ross Island, Antarctica, during AWARE, *Atmos. Chem. Phys.*, 18(12), 8571–8587, doi:10.5194/acp-18-8571-2018, 2018.
- Mace, G. G. and Avey, S.: Seasonal variability of warm boundary layer cloud and precipitation properties in the Southern Ocean as diagnosed from A-Train data, *J. Geophys. Res.*, 122(2), 1015–1032, doi:10.1002/2016JD025348, 2017.
- Mace, G. G. and Protat, A.: Clouds over the Southern Ocean as observed from the R/V investigator during CAPRICORN. Part I: Cloud occurrence and phase partitioning, *J. Appl. Meteorol. Climatol.*, 57(8), 1783–1803, doi:10.1175/JAMC-D-17-0194.1, 2018.
- Martin, G. M., Johnson, D. W. and Spice, A.: The Measurement and Parameterization of Effective Radius of Droplets in Warm Stratocumulus Clouds, *J. Atmos. Sci.*, 51(13), 1823–1842, doi:10.1175/1520-0469(1994)051<1823:tmapoe>2.0.co;2, 1994.
- MATLAB: 9.7.0.1190202 (R2019b), The MathWorks Inc., Natick, Massachusetts., 2019.
- McCoy, D. T., Hartmann, D. L., Grosvenor, D. P., McCoy, D. T., Hartmann, D. L. and Grosvenor, D. P.: Observed Southern Ocean Cloud Properties and Shortwave Reflection. Part II: Phase Changes and Low Cloud Feedback\*, *J. Clim.*, 27(23), 8858–8868, doi:10.1175/JCLI-D-14-00288.1, 2014.

- McCoy, D. T., Burrows, S. M., Wood, R., Grosvenor, D. P., Elliott, S. M., Ma, P.-L. L., Rasch, P. J. and Hartmann, D. L.: Natural aerosols explain seasonal and spatial patterns of Southern Ocean cloud albedo, *Sci. Adv.*, 1(6), e1500157–e1500157, doi:10.1126/sciadv.1500157, 2015.
- McFarquhar, G. M., Bretherton, C., Marchand, R., Protat, A., DeMott, P. J., Alexander, S. P., Roberts, G. C., Twohy, C. H.,  
640 Toohey, D., Siems, S., Huang, Y., Wood, R., Rauber, R. M., Lasher-Trapp, S., Jensen, J., Stith, J., Mace, J., Um, J., Järvinen, E., Schnaiter, M., Gettelman, A., Sanchez, K. J., McCluskey, C. S., Russell, L. M., McCoy, I. L., Atlas, R., Bardeen, C. G., Moore, K. A., Hill, T. C. J., Humphries, R. S., Keywood, M. D., Ristovski, Z., Cravigan, L., Schofield, R., Fairall, C., Mallet, M. D., Kreidenweis, S. M., Rainwater, B., D'Alessandro, J., Wang, Y., Wu, W., Saliba, G., Levin, E. J. T., Ding, S., Lang, F., Truong, S. C. H., Wolff, C., Haggerty, J., Harvey, M. J., Klekociuk, A. and McDonald, A.: Observations of clouds, aerosols,  
645 precipitation, and surface radiation over the Southern Ocean: An overview of CAPRICORN, MARCUS, MICRE and SOCRATES, *Bull. Am. Meteorol. Soc.*, n.d.
- Meskhidze, N. and Nenes, A.: Phytoplankton and Cloudiness in the Southern Ocean, *Science* (80-. ), 314(5804), 1419–1423, doi:10.1126/science.1131779, 2006.
- Meskhidze, N. and Nenes, A.: Effects of Ocean Ecosystem on Marine Aerosol-Cloud Interaction, *Adv. Meteorol.*, 2010, 1–  
650 13, doi:10.1155/2010/239808, 2010.
- Middlebrook, A. M., Murphy, D. M. and Thomson, D. S.: Observations of organic material in individual marine particles at Cape Grim during the First Aerosol Characterization Experiment (ACE 1), *J. Geophys. Res.*, 103(D13), 16475–16483, doi:10.1029/97jd03719, 1998.
- Modini, R. L., Frossard, A. A., Ahlm, L., Russell, L. M., Corrigan, C. E., Roberts, G. C., Hawkins, L. N., Schroder, J. C.,  
655 Bertram, A. K., Zhao, R., Lee, A. K. Y., Abbatt, J. P. D., Lin, J., Nenes, A., Wang, Z., Wonaschuetz, A., Sorooshian, A., Noone, K. J., Jonsson, H., Seinfeld, J. H., Toom-Sauntry, D., Macdonald, A. M. and Leaitch, W. R.: Primary marine aerosol-cloud interactions off the coast of California, *J. Geophys. Res.*, 120(9), 4282–4303, doi:10.1002/2014jd022963, 2015.
- Murphy, D. M., Thomson, D. S., Middlebrook, A. M. and Schein, M. E.: In situ single-particle characterization at Cape Grim, *J. Geophys. Res.*, 103(D13), 16485–16491, doi:10.1029/97jd03281, 1998a.
- 660 Murphy, D. M., Anderson, J. R., Quinn, P. K., McInnes, L. M., Brechtel, F. J., Kreidenweis, S. M., Middlebrook, A. M., Pósfai, M., Thomson, D. S., Buseck, P. R., Posfai, M., Thomson, D. S. and Buseck, P. R.: Influence of sea-salt on aerosol radiative properties in the Southern Ocean marine boundary layer, *Nature*, 392(6671), 62–65, doi:10.1038/32138, 1998b.
- Neubauer, D., Lohmann, U., Hoose, C. and Frontoso, M. G.: Impact of the representation of marine stratocumulus clouds on the anthropogenic aerosol effect, *Atmos. Chem. Phys.*, 14(21), 11997–12022, doi:10.5194/acp-14-11997-2014, 2014.
- 665 O'shea, S. J., Choularton, T. W., Flynn, M., Bower, K. N., Gallagher, M., Crosier, J., Williams, P., Crawford, I., Fleming, Z. L., Listowski, C., Kirchgaessner, A., Ladkin, R. S. and Lachlan-Cope, T.: In situ measurements of cloud microphysics and

- aerosol over coastal Antarctica during the MAC campaign, *Atmos. Chem. Phys.*, 17, 13049–13070, doi:10.5194/acp-17-13049-2017, 2017.
- 670 Odowd, C. D., Smith, M. H., Consterdine, I. E. and Lowe, J. A.: Marine aerosol, sea-salt, and the marine sulphur cycle: A short review, *Atmos. Environ.*, 31(1), 73–80 [online] Available from: %3CGo, 1997.
- Ogunro, O. O., Elliott, S. M., Wingenter, O. W., Deal, C., Fu, W., Collier, N. and Hoffman, F. M.: Evaluating uncertainties in marine biogeochemical models: Benchmarking aerosol precursors, *Atmosphere (Basel)*, 9(5), 1–21, doi:10.3390/atmos9050184, 2018.
- 675 Pandis, S. N., Russell, L. M. and Seinfeld, J. H.: THE RELATIONSHIP BETWEEN DMS FLUX AND CCN CONCENTRATION IN REMOTE MARINE REGIONS, *J. Geophys. Res.*, 99(D8), 16945–16957, doi:10.1029/94jd01119, 1994.
- Patoux, J., Yuan, X. and Li, C.: Satellite-based midlatitude cyclone statistics over the Southern Ocean: 1. Scatterometer-derived pressure fields and storm tracking, *J. Geophys. Res. Atmos.*, 114(4), D04105, doi:10.1029/2008JD010873, 2009.
- Pawlowska, H. and Grabowski, W. W.: Observations of the width of cloud droplet spectra in stratocumulus, 12th Conf. Cloud  
680 Physics, 12th Conf. Atmos. Radiat., 1–5, 2006.
- Perry, K. D. and Hobbs, P. V: FURTHER EVIDENCE FOR PARTICLE NUCLEATION IN CLEAR-AIR ADJACENT TO MARINE CUMULUS CLOUDS, *J. Geophys. Res.*, 99(D11), 22803–22818, doi:10.1029/94jd01926, 1994.
- Petters, M. D. and Kreidenweis, S. M.: A single parameter representation of hygroscopic growth and cloud condensation nucleus activity, *Atmos. Chem. Phys.*, 13(2), 1081–1091, doi:10.5194/acp-13-1081-2013, 2007.
- 685 Pierce, J. R. and Adams, P. J.: Global evaluation of CCN formation by direct emission of sea salt and growth of ultrafine sea salt, *J. Geophys. Res.*, 111(D6), doi:10.1029/2005jd006186, 2006.
- Pirjola, L., O'Dowd, C. D., Brooks, I. M. and Kulmala, M.: Can new particle formation occur in the clean marine boundary layer?, *J. Geophys. Res.*, 105(D21), 26531–26546, doi:10.1029/2000jd900310, 2000.
- Pirjola, L., Lehtinen, K. E. J., Hansson, H. C. and Kulmala, M.: How important is nucleation in regional/global modelling?,  
690 *Geophys. Res. Lett.*, 31(12), doi:10.1029/2004gl019525, 2004.
- Pringle, K. J., Carslaw, K. S., Spracklen, D. V, Mann, G. M. and Chipperfield, M. P.: The relationship between aerosol and cloud drop number concentrations in a global aerosol microphysics model, *Atmos. Chem. Phys.*, 9(12), 4131–4144, doi:10.5194/acp-9-4131-2009, 2009.
- Quinn, P. K., Bates, T. S., Miller, T. L., Coffman, D. J., Johnson, J. E., Harris, J. M., Ogren, J. A., Forbes, G., Anderson, T.  
695 L., Covert, D. S. and Rood, M. J.: Surface submicron aerosol chemical composition: What fraction is not sulfate?, *J. Geophys. Res.*, 105(D5), 6785–6805, doi:10.1029/1999jd901034, 2000.

- Quinn, P. K., Bates, T. S., Schulz, K. S., Coffman, D. J., Frossard, A. A., Russell, L. M., Keene, W. C. and Kieber, D. J.: Contribution of sea surface carbon pool to organic matter enrichment in sea spray aerosol, *Nat. Geosci.*, 7(3), 228–232, doi:10.1038/ngeo2092, 2014.
- 700 Quinn, P. K., Coffman, D. J., Johnson, J. E., Upchurch, L. M. and Bates, T. S.: Small fraction of marine cloud condensation nuclei made up of sea spray aerosol, *Nat. Geosci.*, 10(9), 674–679, doi:10.1038/ngeo3003, 2017.
- Raes, F., VanDingenen, R., Cuevas, E., VanVelthoven, P. F. J. and Prospero, J. M.: Observations of aerosols in the free troposphere and marine boundary layer of the subtropical Northeast Atlantic: Discussion of processes determining their size distribution, *J. Geophys. Res.*, 102(D17), 21315–21328, doi:10.1029/97jd01122, 1997.
- 705 Reus, M., Strom, J., Curtius, J., Pirjola, L., Vignati, E., Arnold, F., Hansson, H. C., Kulmala, M., Lelieveld, J. and Raes, F.: Aerosol production and growth in the upper free troposphere, *J. Geophys. Res.*, 105(D20), 24751–24762, doi:10.1029/2000jd900382, 2000.
- Rinaldi, M., Decesari, S., Finessi, E., Giulianelli, L., Carbone, C., Fuzzi, S., O’Dowd, C. D., Ceburnis, D. and Facchini, M. C.: Primary and Secondary Organic Marine Aerosol and Oceanic Biological Activity: Recent Results and New Perspectives  
710 for Future Studies, *Adv. Meteorol.*, 2010, 1–10, doi:10.1155/2010/310682, 2010.
- Roberts, G. C. and Nenes, A.: A continuous-flow streamwise thermal-gradient CCN chamber for atmospheric measurements, *Aerosol Sci. Technol.*, 39(3), 206–221, doi:10.1080/027868290913988, 2005.
- Rolph, G., Stein, A. and Stunder, B.: Real-time Environmental Applications and Display sYstem: READY, *Environ. Model. Softw.*, 95, 210–228, doi:10.1016/j.envsoft.2017.06.025, 2017.
- 715 Rosenfeld, D., Zhu, Y., Wang, M., Zheng, Y., Goren, T. and Yu, S.: Aerosol-driven droplet concentrations dominate coverage and water of oceanic low-level clouds, *Science (80-. )*, 363(6427), eaav0566, doi:10.1126/science.aav0566, 2019.
- Russell, L. M., Lenschow, D. H., Laursen, K. K., Krummel, P. B., Siems, S. T., Bandy, A. R., Thornton, D. C. and Bates, T. S.: Bidirectional mixing in an ACE 1 marine boundary layer overlain by a second turbulent layer, *J. Geophys. Res. Atmos.*, 103(D13), 16411–16432, doi:10.1029/97JD03437, 1998.
- 720 Russell, L. M., Mensah, A. A., Fischer, E. V., Sive, B. C., Varner, R. K., Keene, W. C., Stutz, J. and Pszenny, A. A. P.: Nanoparticle growth following photochemical alpha- and beta-pinene oxidation at Appledore Island during International Consortium for Research on Transport and Transformation/Chemistry of Halogens at the Isles of Shoals 2004, *J. Geophys. Res.*, 112(D10), doi:10.1029/2006jd007736, 2007.
- Russell, L. M., Takahama, S., Liu, S., Hawkins, L. N., Covert, D. S., Quinn, P. K. and Bates, T. S.: Oxygenated fraction and  
725 mass of organic aerosol from direct emission and atmospheric processing measured on the R/V Ronald Brown during TEXAQS/GoMACCS 2006, *J. Geophys. Res.*, 114, doi:10.1029/2008jd011275, 2009.

- Saliba et al. submitted: Seasonal Differences and Variability of Concentrations, Chemical Composition, and Cloud Condensation Nuclei of Marine Aerosol over the North Atlantic, *J. Geophys. Res. - Atmos.*, (in review), n.d.
- Saliba, G., Chen, C. L., Lewis, S., Russell, L. M., Rivellini, L. H., Lee, A. K. Y., Quinn, P. K., Bates, T. S., Haëntjens, N.,  
730 Boss, E. S., Karp-Boss, L., Baetge, N., Carlson, C. A. and Behrenfeld, M. J.: Factors driving the seasonal and hourly variability of sea-spray aerosol number in the North Atlantic, *Proc. Natl. Acad. Sci. U. S. A.*, 116(41), 20309–20314, doi:10.1073/pnas.1907574116, 2019.
- Sanchez, K. J. and Roberts, G. C.: SOCRATES CCN measurements. Version 1.1, , doi:10.5065/D6Z036XB, 2018.
- Sanchez, K. J., Roberts, G. C., Calmer, R., Nicoll, K., Hashimshoni, E., Rosenfeld, D., Ovadnevaite, J., Preissler, J., Ceburnis,  
735 D., O&apos;Dowd, C. and Russell, L. M.: Top-down and Bottom-up aerosol-cloud-closure: towards understanding sources of uncertainty in deriving cloud radiative flux, *Atmos. Chem. Phys. Discuss.*, 17(March), 1–32, doi:10.5194/acp-2017-201, 2017.
- Sanchez, K. J., Chen, C. L., Russell, L. M., Betha, R., Liu, J., Price, D. J., Massoli, P., Ziemba, L. D., Crosbie, E. C., Moore, R. H., Müller, M., Schiller, S. A., Wisthaler, A., Lee, A. K. Y., Quinn, P. K., Bates, T. S., Porter, J., Bell, T. G., Saltzman, E.  
740 S., Vaillancourt, R. D. and Behrenfeld, M. J.: Substantial Seasonal Contribution of Observed Biogenic Sulfate Particles to Cloud Condensation Nuclei, *Sci. Rep.*, 8(1), 3235, doi:10.1038/s41598-018-21590-9, 2018.
- Schmale, J.: OVERVIEW OF THE ANTARCTIC CIRCUMNAVIGATION EXPEDITION :STUDY OF PREINDUSTRIAL-LIKE AEROSOLS AND THEIR CLIMATE EFFECTS (ACE-SPACE), 2019.
- Schmale, J., Schneider, J., Nemitz, E., Tang, Y. S., Dragosits, U., Blackall, T. D., Trathan, P. N., Phillips, G. J., Sutton, M.  
745 and Braban, C. F.: Sub-Antarctic marine aerosol: dominant contributions from biogenic sources, *Atmos. Chem. Phys.*, 13(17), 8669–8694, doi:10.5194/acp-13-8669-2013, 2013.
- Seinfeld, J. H., Bretherton, C. S., Carslaw, K. S., Coe, H., DeMott, P. J., Dunlea, E. J., Feingold, G., Ghan, S., Guenther, A. B., Kahn, R., Kraucunas, I., Kreidenweis, S. M., Molina, M. J., Nenes, A., Penner, J. E., Prather, K. A., Ramanathan, V., Ramaswamy, V., Rasch, P. J., Ravishankara, A. R., Rosenfeld, D., Stephens, G. and Wood, R.: Improving our fundamental  
750 understanding of the role of aerosol-cloud interactions in the climate system., *Proc. Natl. Acad. Sci. U. S. A.*, 113(21), 5781–90, doi:10.1073/pnas.1514043113, 2016.
- Siebert, H. and Shaw, R. A.: Supersaturation fluctuations during the early stage of cumulus formation, *J. Atmos. Sci.*, 74(4), 975–988, doi:10.1175/JAS-D-16-0115.1, 2017.
- Snider, J. R., Guibert, S., Brenguier, J. L. and Putaud, J. P.: Aerosol activation in marine stratocumulus clouds: 2. Kohler and  
755 parcel theory closure studies, *J. Geophys. Res.*, 108(D15), doi:10.1029/2002jd002692, 2003.
- Stein, A. F., Draxler, R. R., Rolph, G. D., Stunder, B. J. B., Cohen, M. D., Ngan, F., Stein, A. F., Draxler, R. R., Rolph, G.

- D., Stunder, B. J. B. B., Cohen, M. D. and Ngan, F.: No Title., 2015.
- Stevens, B. and Feingold, G.: Untangling aerosol effects on clouds and precipitation in a buffered system, *Nature*, 461(7264), 607–613, doi:10.1038/nature08281, 2009.
- 760 Stevens, B. and Seifert, A.: Understanding macrophysical outcomes of microphysical choices in simulations of shallow cumulus convection, *J. Meteorol. Soc. Japan*, 86A, 143–162, doi:10.2151/jmsj.86a.143, 2008.
- Strapp, J. W., Leaitech, W. R. and Liu, P. S. K.: Hydrated and dried aerosol-size-distribution measurements from the Particle Measuring Systems FSSP-300 probe and the deiced PCASP-100X probe, *J. Atmos. Ocean. Technol.*, 9(5), 548–555, doi:10.1175/1520-0426(1992)009<0548:HADASD>2.0.CO;2, 1992.
- 765 Thornton, D. C., Bandy, A. R., Blomquist, B. W., Bradshaw, J. D. and Blake, D. R.: Vertical transport of sulfur dioxide and dimethyl sulfide in deep convection and its role in new particle formation, *J. Geophys. Res.*, 102(D23), 28501–28509, doi:10.1029/97jd01647, 1997.
- Trenberth, K. E. and Fasullo, J. T.: Simulation of present-day and twenty-first-century energy budgets of the southern oceans, *J. Clim.*, 23(2), 440–454, doi:10.1175/2009JCLI3152.1, 2010.
- 770 Twohy, C. H., Clement, C. F., Gandrud, B. W., Weinheimer, A. J., Campos, T. L., Baumgardner, D., Brune, W. H., Faloona, I., Sachse, G. W., Vay, S. A. and Tan, D.: Deep convection as a source of new particles in the midlatitude upper troposphere, *J. Geophys. Res. Atmos.*, 107(21), AAC 6-1-AAC 6-10, doi:10.1029/2001JD000323, 2002.
- Twohy, C. H., DeMott, P. J., Russell, L. M., Toohey, D. W., Rainwater, B., Geiss, R., Sanchez, K. J., Lewis, S., Roberts, G., Humphries, R. S., McCluskey, C. S., Moore, K. A., Selleck, P. W., Keywood, M. D., Ward, J. P. and McRobert, I. M.: Cloud-
- 775 Nucleating Particles over the Southern Ocean in a Changing Climate, *Earth's Futur.*, n.d.
- UCAR/NCAR-Earth Observing Laboratory: Low Rate (LRT - 1 sps) Navigation, State Parameter, and Microphysics Flight-Level Data. Version 1.3, , doi:10.5065/D6M32TM9, 2019.
- UCAR/NCAR - Earth Observing Laboratory: NSF/NCAR GV HIAPER Aircraft, , doi:10.5065/D6DR2SJP, 2005.
- Vallina, S. M., Simó, R. and Gassó, S.: What controls CCN seasonality in the Southern Ocean? A statistical analysis based on
- 780 satellite-derived chlorophyll and CCN and model-estimated OH radical and rainfall, *Global Biogeochem. Cycles*, 20(1), n/a-n/a, doi:10.1029/2005GB002597, 2006.
- Vana, M., Virkkula, A., Hirsikko, A., Aalto, P., Kulmala, M. and Hillamo, R.: Air Ion Measurements During a Cruise from Europe to Antarctica, in *Nucleation and Atmospheric Aerosols*, edited by C. D. O'Dowd and P. E. Wagner, pp. 368–372, Springer Netherlands, Dordrecht., 2007.
- 785 Weber, R. J., McMurry, P. H., Mauldin, L., Tanner, D. J., Eisele, F. L., Brechtel, F. J., Kreidenweis, S. M., Kok, G. L., Schillawski, R. D. and Baumgardner, B.: A study of new particle formation and growth involving biogenic and trace gas

species measured during ACE 1, *J. Geophys. Res. Atmos.*, 103(D13), 16385–16396, doi:10.1029/97JD02465, 1998.

Weller, R., Schmidt, K., Teinilä, K. and Hillamo, R.: Natural new particle formation at the coastal Antarctic site Neumayer, *Atmos. Chem. Phys.*, 15(19), 11399–11410, doi:10.5194/acp-15-11399-2015, 2015.

790 Weller, R., Legrand, M. and Preunkert, S.: Size distribution and ionic composition of marine summer aerosol at the continental Antarctic site Kohnen, *Atmos. Chem. Phys.*, 18(4), 2413–2430, doi:10.5194/acp-18-2413-2018, 2018.

Whittlestone, S. and Zahorowski, W.: Baseline radon detectors for shipboard use: Development and deployment in the First Aerosol Characterization Experiment (ACE 1), *J. Geophys. Res.*, 103(D13), 16743–16751, doi:10.1029/98jd00687, 1998.

Williamson, C. J., Kupc, A., Axisa, D., Bilsback, K. R., Bui, T. P., Campuzano-Jost, P., Dollner, M., Froyd, K. D., Hodshire, 795 A. L., Jimenez, J. L., Kodros, J. K., Luo, G., Murphy, D. M., Nault, B. A., Ray, E. A., Weinzierl, B., Wilson, J. C., Yu, F., Yu, P., Pierce, J. R. and Brock, C. A.: A large source of cloud condensation nuclei from new particle formation in the tropics, *Nature*, 574(7778), 399–403, doi:10.1038/s41586-019-1638-9, 2019.

Wood, R., Wyant, M., Bretherton, C. S., Remillard, J., Kollias, P., Fletcher, J., Stemmler, J., de zoeKe, S., YuteR, S., MilleR, M. M., Mechem, D., Tselioudis, G., Chiu, J. C., Mann, J. A. L., O’Connor, E. J., HoGan, R. J., DonG, X. Q., Ghate, V., 800 Jefferson, A., Min, qilonG L., Minnis, P., Palikonda, R., Albrecht, Br., LuKe, E., Hannay, C. and Lin, yanluan L.: CLOUDS, AEROSOLS, AND PRECIPITATION IN THE MARINE BOUNDARY LAYER An ARM Mobile Facility Deployment, *Bull. Am. Meteorol. Soc.*, 96(3), 419–439, doi:10.1175/bams-d-13-00180.1, 2015.

Woodhouse, M. T., Carslaw, K. S., Mann, G. W., Vallina, S. M., Vogt, M., Halloran, P. R. and Boucher, O.: Low sensitivity of cloud condensation nuclei to changes in the sea-air flux of dimethyl-sulphide, *Atmos. Chem. Phys.*, 10(16), 7545–7559, 805 doi:10.5194/acp-10-7545-2010, 2010.

Yoon, Y. J. and Brimblecombe, P.: Modelling the contribution of sea salt and dimethyl sulfide derived aerosol to marine CCN, *Atmos. Chem. Phys.*, 2(1), 17–30, doi:10.5194/acp-2-17-2002, 2002.

Yue, G. K. and Deepak, A.: TEMPERATURE-DEPENDENCE OF THE FORMATION OF SULFATE AEROSOLS IN THE STRATOSPHERE, *J. Geophys. Res.*, 87(NC4), 3128–3134, doi:10.1029/JC087iC04p03128, 1982.

810

**Table 1. Mean and standard deviation of CN and CCN<sub>0.3</sub> number concentration for the four identified regimes measured in the GV MBL legs.**

| Regime          | CN (cm <sup>-3</sup> ) | CCN <sub>0.3</sub> (cm <sup>-3</sup> ) |
|-----------------|------------------------|----------------------------------------|
| Aged            | 485±81                 | 187±37                                 |
| Aged + RPF      | 958±92                 | 175±84                                 |
| Scavenged       | 407±147                | 83±31                                  |
| Scavenged + RPF | 860±98                 | 84±33                                  |

815

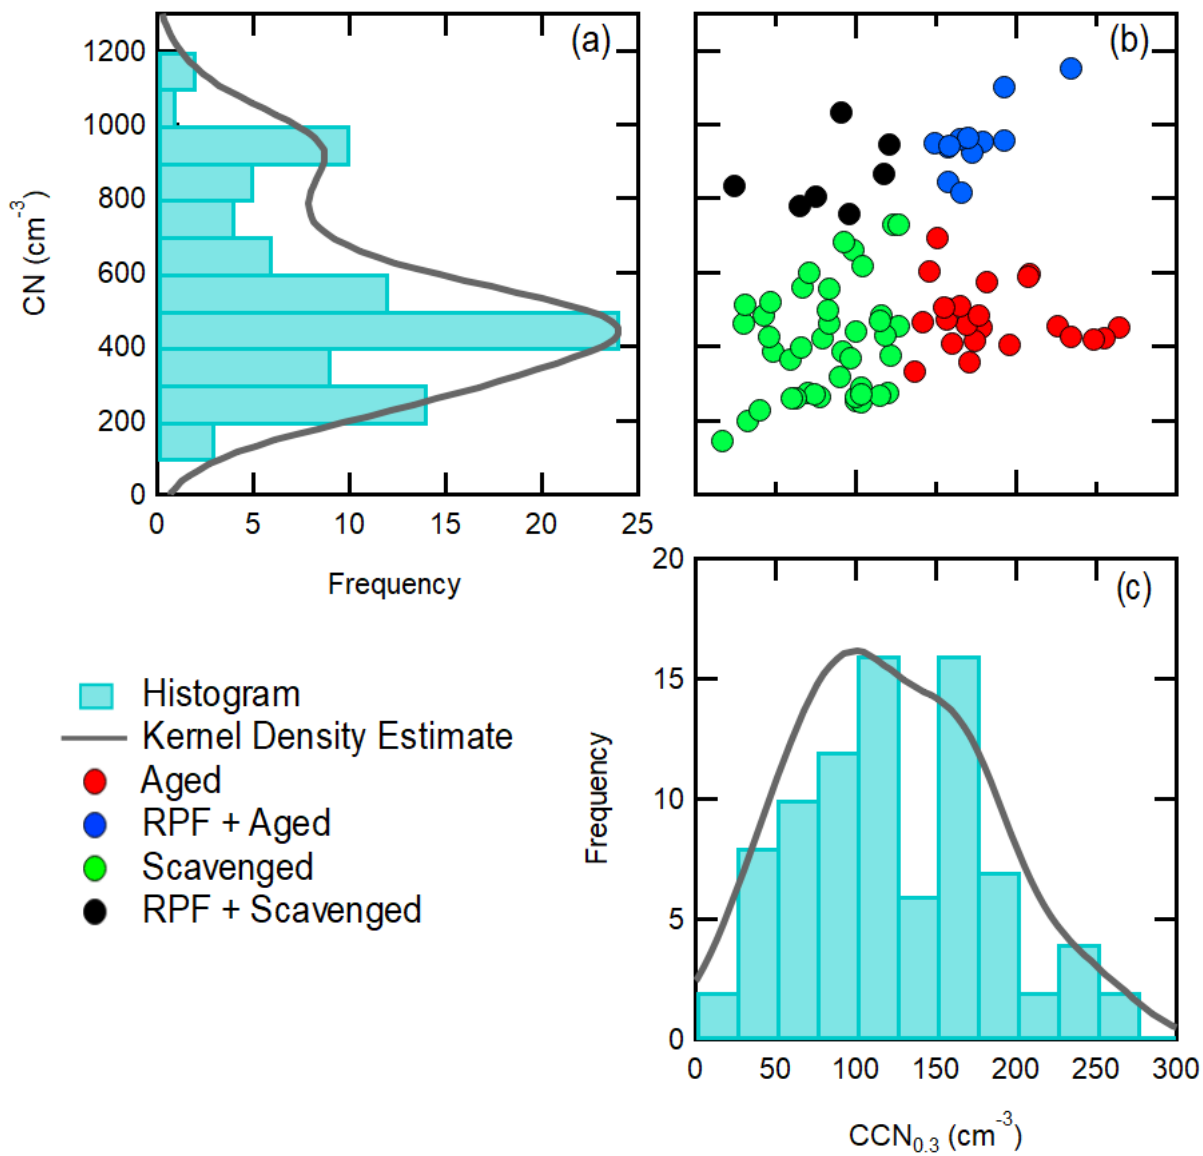

Figure 1. Histograms and kernel density estimates of (a) CN concentrations and (c) MBL  $\text{CCN}_{0.3}$  (CCN concentration at 0.3% supersaturation). (b) MBL CN and  $\text{CCN}_{0.3}$ . Measurements are divided into four particle regimes based on the observed bimodal distributions of both CN and  $\text{CCN}_{0.3}$ .

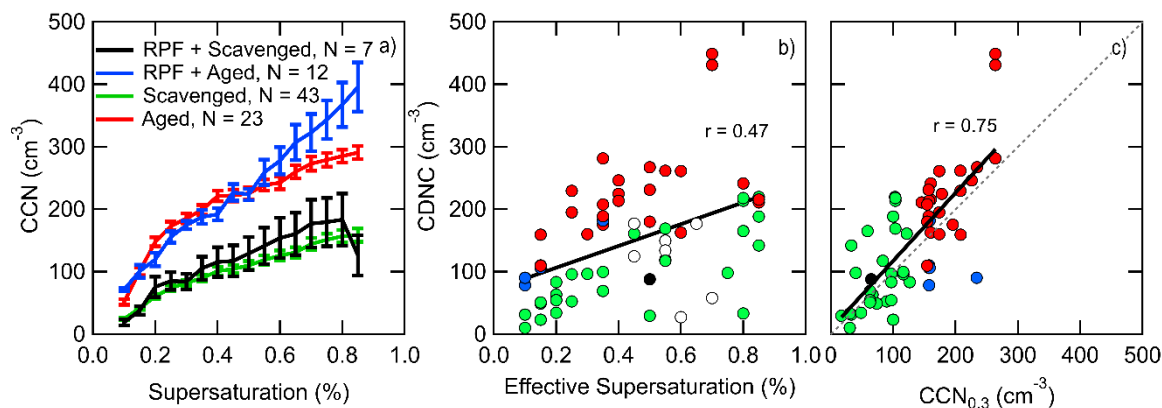

**Figure 2.** (a) Mean MBL CCN spectra for each regime. The number of samples (N) at each supersaturation of the CCN spectra varied from the number of samples in the legend because occasionally CCN spectra scans were not fully completed by the end of the MBL leg. Error bars represent the standard error ( $\sigma/\sqrt{N}$ ). Correlations of measured CDNC with (b) calculated effective supersaturation and (c) measured MBL CCN<sub>0.3</sub>. Empty points did not have a corresponding CCN<sub>0.3</sub> or CN measurement. Solid lines in (b) and (c) represent linear fits and the dashed line in (c) represents the 1:1 line.

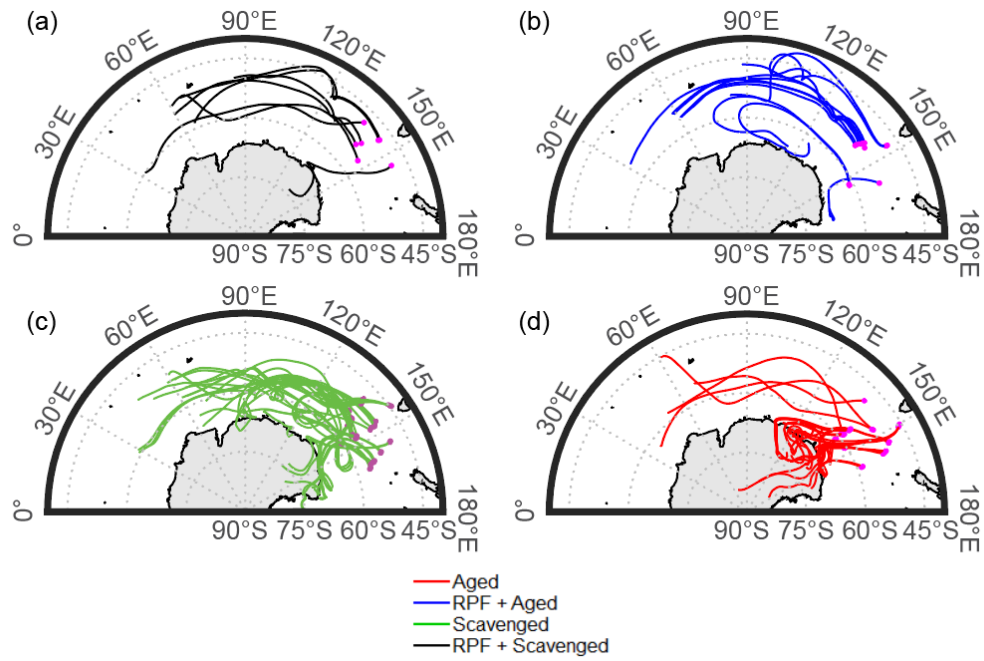

**Figure 3.** Five-day HYSPLIT back trajectories starting from MBL legs (at 50-500 m amsl., magenta points) for each particle regime.

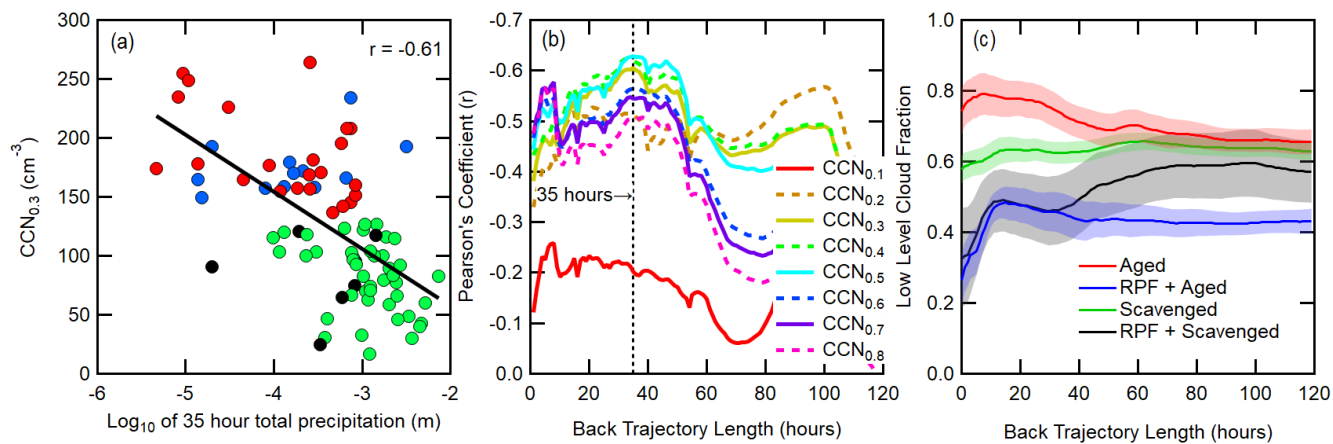

**Figure 4. (a) Correlation of MBL  $CCN_{0.3}$  and total precipitation that occurred along a 35-hour HYSPLIT back trajectory. Marker colors correspond to legend in (c). (b)  $CCN$  and back trajectory total precipitation correlation coefficient as a function of back trajectory length. Vertical dashed line indicates peak in correlation with  $CCN_{0.3}$  at 35-hours. (c) Particle regime averaged ERA5 low-level cloud fraction over the five-day back trajectory. Shaded areas represent one standard error.**

835

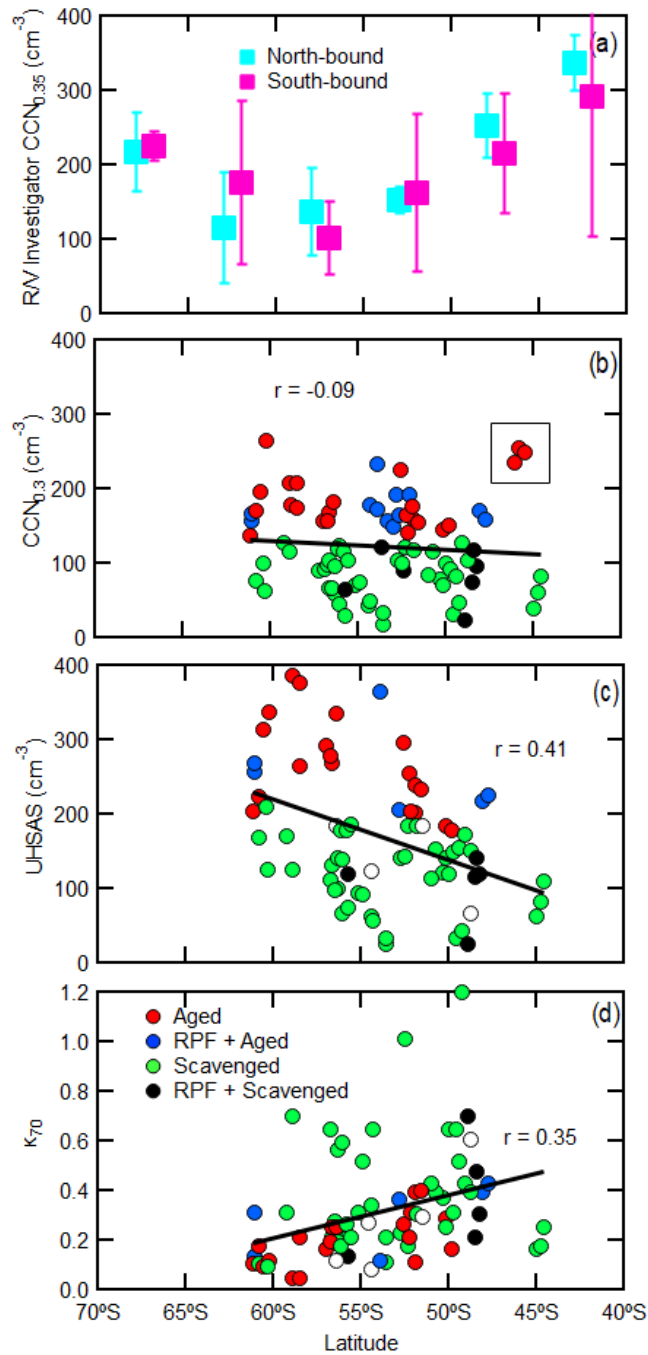

**Figure 5.** (a)  $5^\circ$  latitude bin averaged  $CCN_{0.35}$  from the *R/V Investigator*. Correlation of latitude to (b) HIAPER GV  $CCN_{0.3}$  (c) total particle concentration with  $D_p > 0.07 \mu m$  (UHSAS) and (d)  $\kappa$  derived at  $0.07 \mu m$ . White points in (c) and (d) did not have a corresponding  $CCN_{0.3}$  or CN measurement. Pearson's coefficient for (b) is  $r = -0.27$  when excluding the three outliers at  $\sim 46^\circ S$  highlighted in the black square.

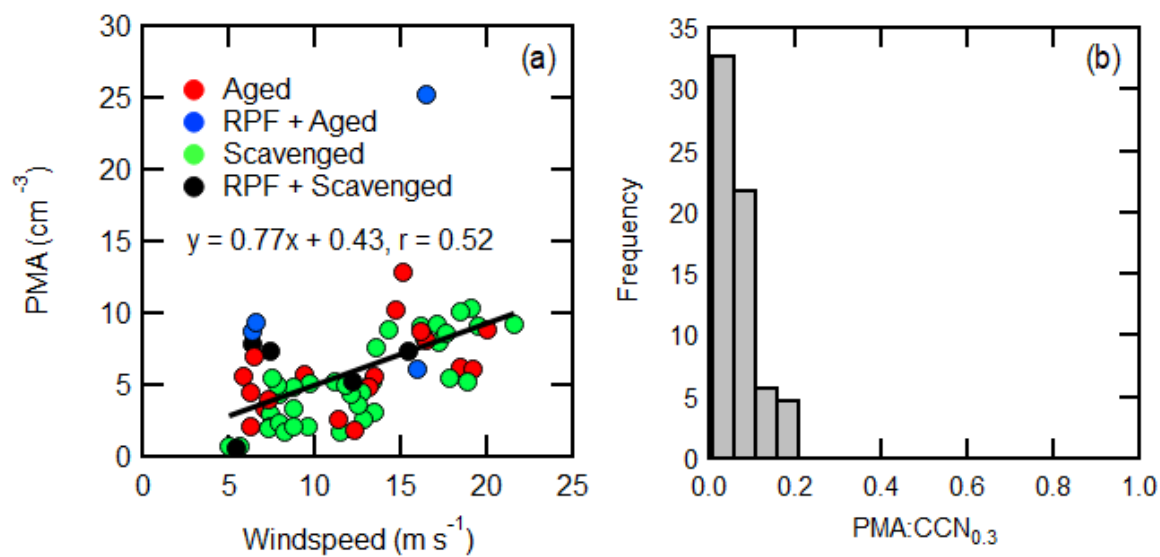

**Figure 6.** (a) Correlation of estimated PMA concentration and wind speed, and (b) the fraction of PMA accounting for CCN<sub>0.3</sub> for MBL legs. Exclusion of the outlier in (a) increases the Pearson's Coefficient to 0.59 .

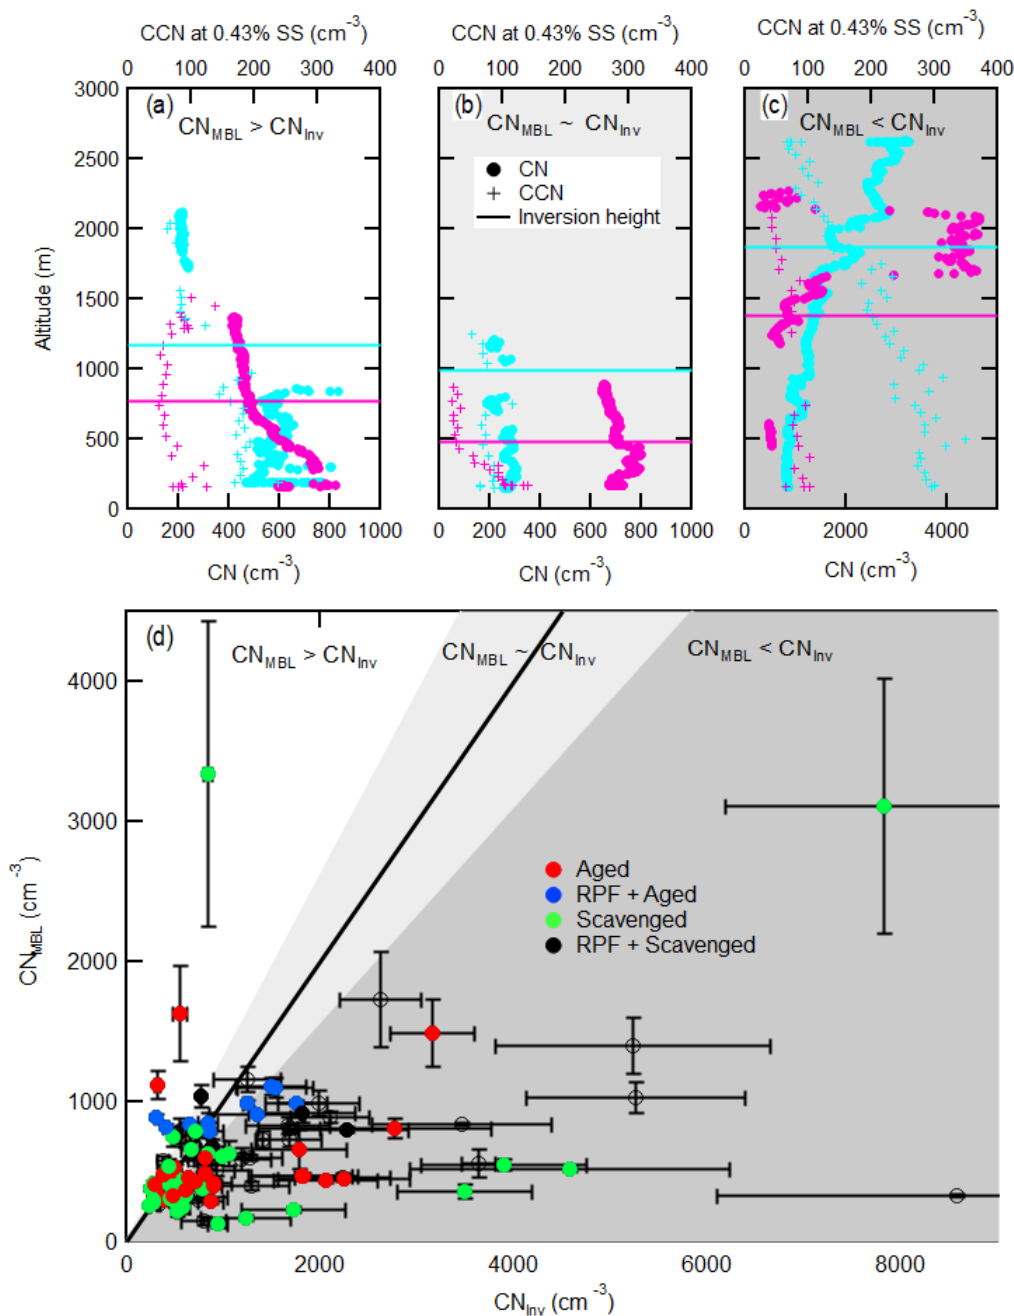

845 **Figure 7. Vertical profiles of CN and CCN at 0.43% supersaturation corresponding to (a) elevated CN concentrations in the MBL, (b) well-mixed CN profiles and (c) elevated CN concentrations aloft. The cyan and magenta points in (a-c) represent 2 different vertical profiles. (d) Comparison of CN measured in the surface coupled MBL and decoupled layer or FT. Error bars represent standard error. Empty markers do not have a corresponding  $CCN_{0.3}$  measurement.**

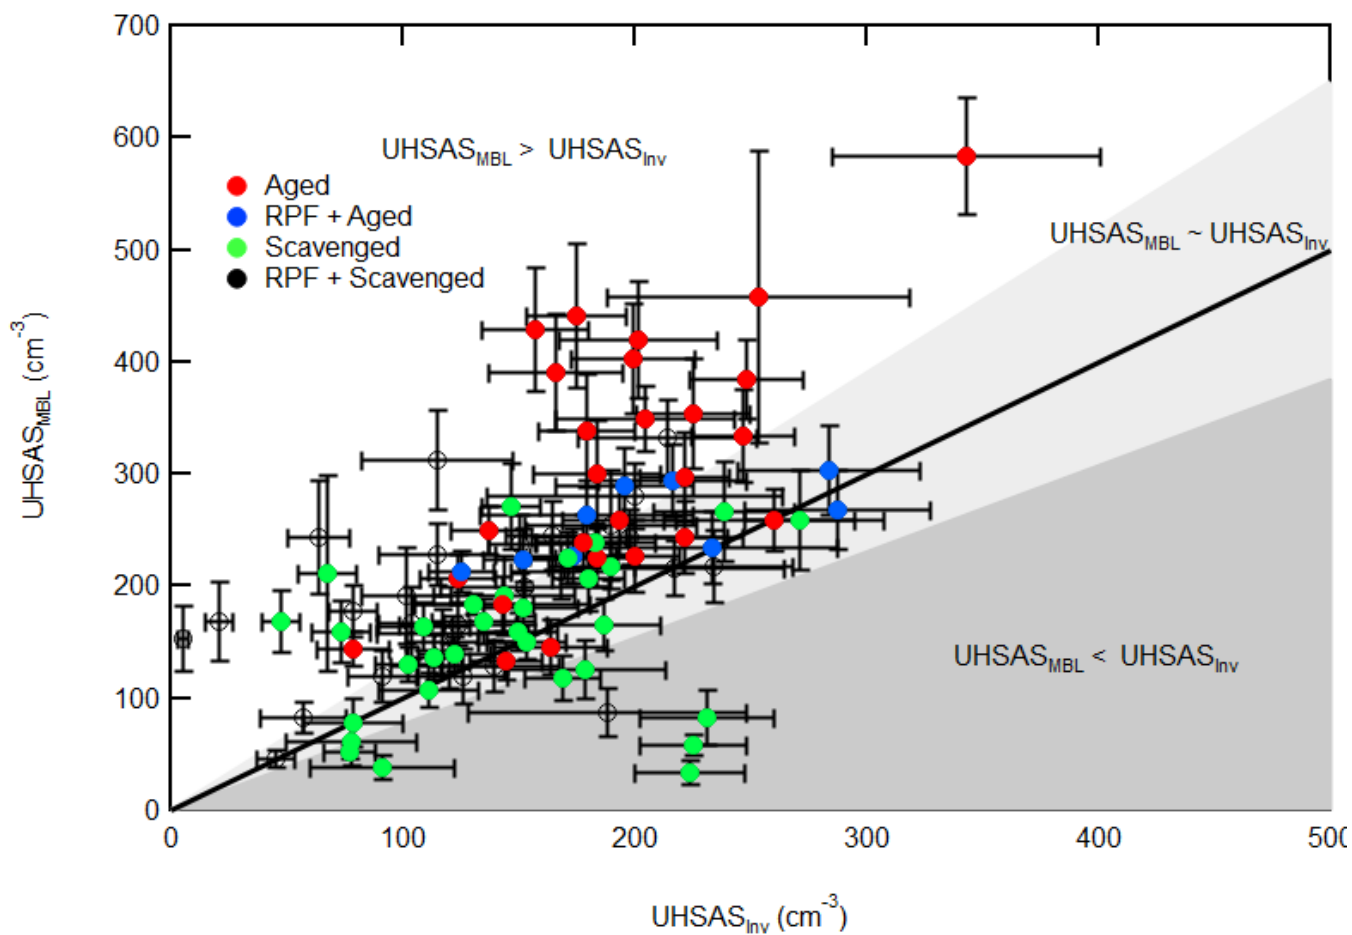

850 **Figure 8.** Comparison of UHSAS concentrations ( $D_p > 0.07 \mu\text{m}$ ) measured in the surface coupled MBL and decoupled layer or FT. Error bars represent standard error. Empty markers do not have a corresponding  $\text{CCN}_{0.3}$  measurement.

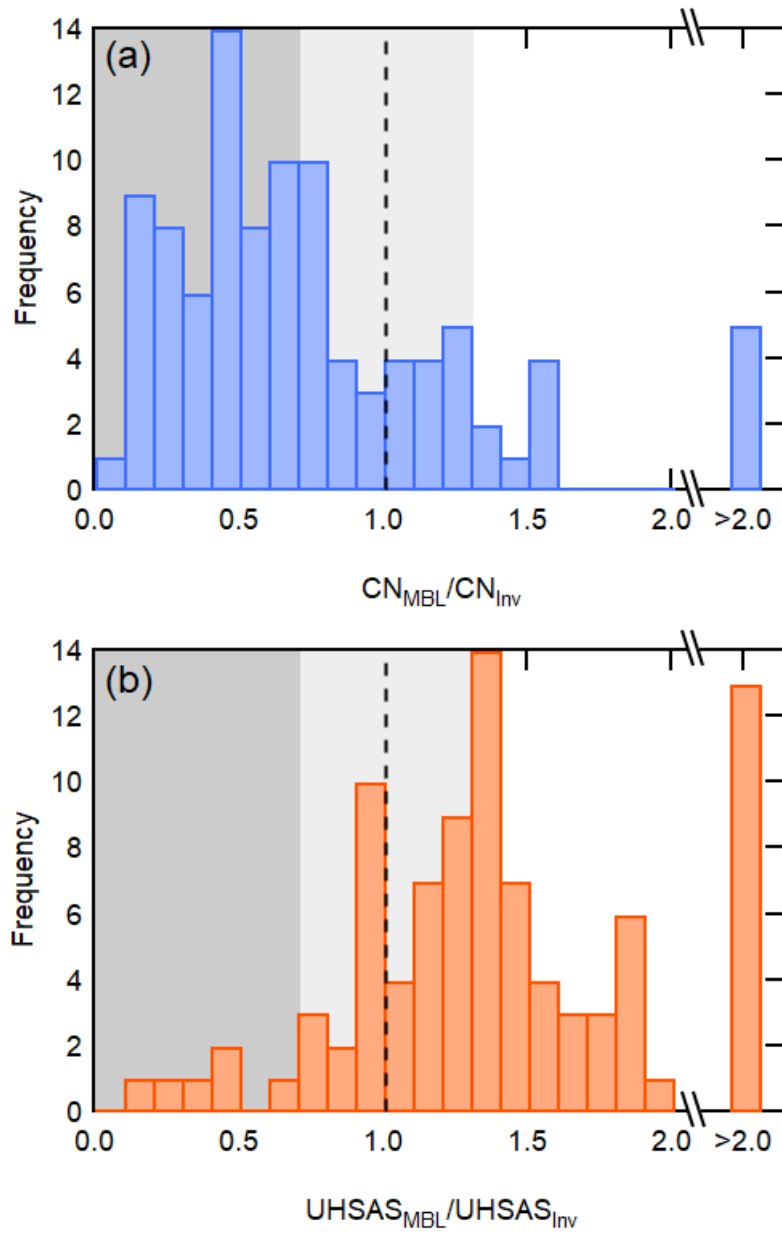

Figure 9. Histogram of (a)  $CN_{MBL}/CN_{Inv}$  from Figure 7 and (b)  $UHSAS_{MBL}/UHSAS_{Inv}$  from Figure 8.
